# Supplementary material
Source: publisher figshare collection journal article supplement (https://acs.figshare.com/ndownloader/files/4498351)

## Direct Catalytic Asymmetric Aldol Reactions of Thioamides: Toward a Stereocontrolled Synthesis of 1,3-Polyols

Mitsutaka Iwata, Ryo Yazaki, Yuta Suzuki, Naoya Kumagai,\* and Masakatsu Shibasaki\*

*Graduate School of Pharmaceutical Sciences, The University of Tokyo, Japan*

mshibasa@mol.f.u-tokyo.ac.jp, nkumagai@mol.f.u-tokyo.ac.jp

---

1. General
2. Instrumentation
3. Materials
4. General Procedure for Direct Catalytic Asymmetric Aldol Reaction of Thioamides
5. Procedures for the Synthesis of Compounds **5** and **6**
6. Determination of the Absolute Configuration of the Aldol Product
7. NMR & MS Analyses of Catalyst—Product Complex
8. Estimation of pKa of Pentamethylchromanol by DFT Calculation
9. Characterization of Aldol Products
10. NMR spectra of New Compounds

## 1. General

Catalytic asymmetric aldol reaction was performed in a flame-dried 20 mL test tube with a Teflon-coated magnetic stirring bar unless otherwise noted. The test tubes were fitted with a 3-way glass stopcock and reactions were run under Ar atmosphere. All work-up and purification procedures were carried out with reagent-grade solvents under ambient atmosphere.

## 2. Instrumentation

Infrared (IR) spectra were recorded on a JASCO FT/IR 410 Fourier transform infrared spectrophotometer. NMR was recorded on JEOL LA-500, JEOL ECX-500 spectrometers. Chemical shifts for proton are reported in parts per million downfield from tetramethylsilane and are referenced to residual protium in the NMR solvent (CDCl<sub>3</sub>:  $\delta$  7.26 ppm, C<sub>6</sub>D<sub>6</sub>:  $\delta$  7.16 ppm). For <sup>13</sup>C NMR, chemical shifts were reported in the scale relative to NMR solvent (CDCl<sub>3</sub>: 77.0 ppm, C<sub>6</sub>D<sub>6</sub>:  $\delta$  128.0) as an internal reference. NMR data are reported as follows: chemical shifts, multiplicity (s: singlet, d: doublet, dd: doublet of doublets, t: triplet, q: quartet, sep: septet, m: multiplet, br: broad signal), coupling constant (Hz), and integration. Optical rotation was measured using a 1 mL cell with a 0.5 dm path length on a JASCO polarimeter P-1010. ESI mass spectra were measured on Waters-ZQ4000. High-resolution mass spectra (ESI TOF (+)w) were measured on JEOL AccuTOF JMS-T100LC. HPLC analysis was conducted on a JASCO HPLC system equipped with Daicel chiral stationary phase columns.

## 3. Materials

Unless otherwise noted, materials were purchased from commercial suppliers and were used without purification. THF was distilled from sodium/benzophenone ketyl. Dry DMF and <sup>n</sup>BuLi in *n*-hexane were purchased from Kanto Chemical Co. Ltd. (*R,R*)-Ph-BPE and (*S,S*)-Ph-BPE were purchased from Strem Chemical Co. Ltd. and used as received (handled in a dry box). 2,2,5,7,8-Pentamethylchromanol was purchased from Aldrich and recrystallized from benzene. [Cu(CH<sub>3</sub>CN)<sub>4</sub>]PF<sub>6</sub> was purchased from Aldrich and used as received. Aldehydes used in Table 1 and 2 were distilled before use. *o*-Methoxyphenol was purchased from Wako Pure Chemical Co. Ltd. and distilled before use. Cp<sub>2</sub>Zr(H)Cl was purchased from TCI and used as received (handled in a dry box). Column chromatography was performed with silica gel Merck 60 (230–400 mesh ASTM).

## 4. General Procedure for the Direct Aldol Reaction of Thioamide

For Table 2, entry 1.

To a flame-dried 5 mL pear-shaped flask equipped with a magnetic stirring bar and a 3-way-top was charged with 2,2,5,7,8-pentamethylchromanol (17.6 mg, 0.08 mmol) and dried under vacuum for 60 min. Ar was back-filled to the flask and dry THF (0.4 mL) was added via a stainless steel needle and a syringe. To the solution was added <sup>n</sup>BuLi (51  $\mu$ L, 0.08 mmol, 1.57 M in *n*-hexane) at -78 °C and stirred at the same temperature for 60 min to give 0.2 M lithium 2,2,5,7,8-Pentamethylchromanolate solution in THF, which was stored at room temperature and used within 15 min.

To a flame-dried 5 mL pear-shaped flask equipped with a magnetic stirring bar and a 3-way-top were charged with (*R,R*)-Ph-BPE (40.5 mg, 0.08 mmol) and [Cu(CH<sub>3</sub>CN)<sub>4</sub>]PF<sub>6</sub> (29.8 mg, 0.08 mmol) in a dry box. To the mixture was added THF (0.8 mL) via syringe to give 0.1 M THF solution of (*R,R*)-Ph-BPE/Cu solution, which was stored at room temperature and used within 3 h.

To a flame-dried 20 mL test tube equipped with a magnetic stirring bar and a 3-way-top were added (*R,R*)-Ph-BPE/Cu solution (0.1 M/THF, 120  $\mu$ L, 0.012 mmol), dry DMF (4 mL), *N,N*-diallylthioacetamide (**1a**)

Direct Catalytic Asymmetric Aldol Reactions of Thioamides: Toward a Stereocontrolled Synthesis of 1,3-polyols (76.4  $\mu$ L, 0.48 mmol) and isobutyraldehyde (**2a**) (36.3  $\mu$ L, 0.4 mmol) under Ar at room temperature. The test tube was immersed into the electronically-controlled cooling bath at  $-60$   $^{\circ}$ C with 2-propanol as medium. To the solution was added lithium 2,2,5,7,8-Pentamethylchromanolate (0.2M/THF, 60  $\mu$ L, 0.012 mmol) and stirred at  $-60$   $^{\circ}$ C. After 40 h of stirring, sat.  $\text{NH}_4\text{Cl}$  aq. and bipyridine (18.7 mg) were added to the reaction mixture (essential to make sure the dissociation of the product from Cu complex) and aqueous layer was extracted with ethyl acetate. The combined organic layers were washed with brine, then dried over  $\text{Na}_2\text{SO}_4$ . Filtrate was concentrated under reduced pressure and the resulting residue was purified by silica gel column chromatography (eluent  $n$ -hexane/ $\text{CH}_2\text{Cl}_2$  = 2/1 – 1/5) to give **3aa** as a colorless oil (78.8 mg, 0.35 mmol, 87%). Enantiomeric excess was determined by HPLC analysis.

### (*R*)-*N,N*-Diallyl-3-hydroxy-4-methylpentanethioamide (**3aa**)

Colorless oil; IR (KBr)  $\nu$  3405, 2956, 2929, 2856, 1521, 1073, 835  $\text{cm}^{-1}$ ;  $^1\text{H}$  NMR ( $\text{CDCl}_3$ )  $\delta$  5.86 (dddd,  $J$  = 17.7, 10.4, 5.8, 5.8 Hz, 1H), 5.77 (dddd,  $J$  = 17.1, 10.7, 4.6, 4.6 Hz, 1H), 5.29-5.12 (m, 4H), 4.69 (dd,  $J$  = 14.7, 5.8 Hz, 1H), 4.57 (dd,  $J$  = 14.7, 5.8 Hz, 1H), 4.29-4.22 (m, 1H), 4.14-4.08 (m, 1H), 3.90 (ddd,  $J$  = 9.8, 5.5, 1.9 Hz, 1H), 3.70 (brs, 1H), 2.80 (dd,  $J$  = 15.6, 1.9 Hz, 1H), 2.65 (dd,  $J$  = 15.6, 9.8 Hz, 1H), 1.79-1.70 (m, 1H), 0.95 (d,  $J$  = 7.0 Hz, 3H), 0.93 (d,  $J$  = 7.3 Hz, 3H);  $^{13}\text{C}$  NMR ( $\text{CDCl}_3$ )  $\delta$  203.5, 130.6, 130.5, 118.6, 117.9, 74.6, 55.8, 52.9, 45.2, 33.3, 18.5, 17.8;  $[\alpha]_{\text{D}}^{23}$  +92.1 ( $c$  1.0,  $\text{CHCl}_3$ , 91% ee sample); ESI-MS  $m/z$  250  $[\text{M}+\text{Na}]^+$ ; HRMS (ESI-TOF) Anal. calcd. for  $\text{C}_{12}\text{H}_{21}\text{NNaOS}$   $m/z$  250.1232  $[\text{M}+\text{Na}]^+$ , found 250.1246; HPLC: Daicel CHIRALCEL OD-H ( $\phi$  0.46 cm x 25 cm), 2-propanol/ $n$ -hexane = 1/99, flow rate 0.5 mL/min, detection 254 nm,  $t_{\text{R}}$  = 17.0 min (minor), 22.1 min (major).

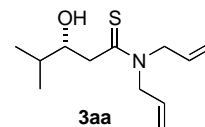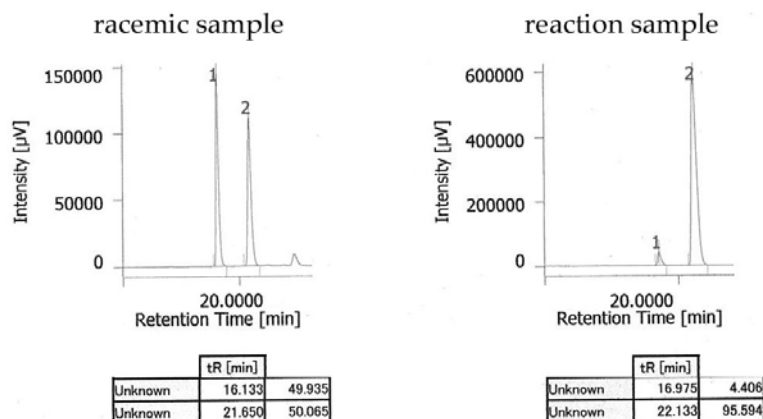

## 5. Procedures for the Synthesis of Compounds 5 and 6

### 5-1. TBS protection of **3ba**.

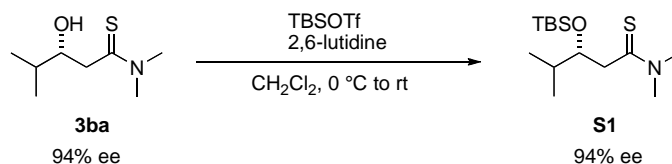

### (*R*)-3-(*tert*-Butyldimethylsilyloxy)-*N,N*,4-trimethylpentanethioamide (**S1**)

To a stirred solution of **3ba** (296 mg, 1.69 mmol, 94% ee) in  $\text{CH}_2\text{Cl}_2$  (20 mL) were added 2,6-lutidine (390  $\mu$ L, 3.38 mmol) and TBSOTf (580  $\mu$ L, 2.53 mmol) at 0  $^{\circ}$ C. After stirring the resulting solution at room temperature for 10 h, sat.  $\text{NH}_4\text{Cl}$  aq. was added and the aqueous layer was extracted with  $\text{CH}_2\text{Cl}_2$ . The combined organic layers were washed with brine and dried over  $\text{Na}_2\text{SO}_4$ . The filtrate was concentrated under reduced pressure and the resulting residue was purified by silica gel column chromatography (eluent:  $n$ -hexane/ethyl acetate = 1/0 – 20/1) to give **S1** as colorless oil (479.4 mg, 1.66 mmol, 98% yield). Enantiomeric excess remained unchanged in the transformation as confirmed by HPLC analysis.

**(*R*)-3-(*tert*-Butyldimethylsilyloxy)-*N,N*,4-trimethylpentanethioamide (**S1**)**

Pale yellow oil; IR (KBr)  $\nu$  2956, 2929, 2886, 2456, 1519, 1086, 962  $\text{cm}^{-1}$ ;  $^1\text{H}$  NMR ( $\text{CDCl}_3$ )  $\delta$  4.28 (ddd,  $J = 9.8, 3.4, 3.1$  Hz, 1H), 3.47 (s, 3H), 3.38 (s, 3H), 3.12 (dd,  $J = 12.8, 9.8$  Hz, 1H), 2.66 (dd,  $J = 12.8, 3.1$  Hz, 1H), 1.84 (dsep,  $J = 7.0, 3.7$  Hz, 1H), 0.93 (d,  $J = 7.0$  Hz, 3H), 0.92 (d,  $J = 7.0$  Hz, 3H), 0.86 (s, 9H), 0.05 (s, 3H), -0.03 (s, 3H);  $^{13}\text{C}$  NMR ( $\text{CDCl}_3$ )  $\delta$  203.0, 78.7, 45.0, 44.8, 42.5, 34.2, 25.9, 18.1, 18.0, 16.5, -4.2, -5.1;  $[\alpha]_{\text{D}}^{23} +52.7$  ( $c$  1.2,  $\text{CHCl}_3$ , 94% ee sample); ESI-MS  $m/z$  312  $[\text{M}+\text{Na}]^+$ ; HRMS (ESI-TOF) Anal. calcd. for  $\text{C}_{14}\text{H}_{31}\text{NNaOSiS}$   $m/z$  312.1788  $[\text{M}+\text{Na}]^+$ , found 312.1784; HPLC: Daicel CHIRALCEL OZ-H ( $\phi$  0.46 cm x 25 cm), 2-propanol/*n*-hexane = 1/99, flow rate 1.0 mL/min, detection 254 nm,  $t_{\text{R}} = 8.5$  min (major), 11.1 min (minor).

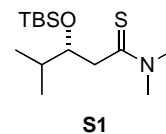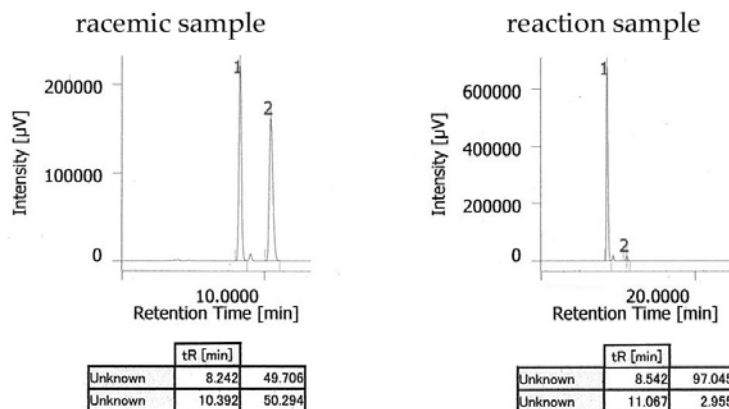

**5-2. Reduction of thioamide functionality of **S1** to aldehyde.**

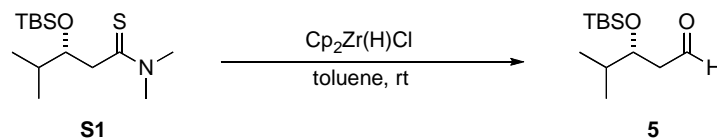

To a white suspension of  $\text{Cp}_2\text{Zr(H)Cl}$  (597 mg, 2.31 mmol) in toluene (8.5 mL) was added **S1** (335 mg, 1.16 mmol) in toluene (17 mL) at room temperature and the resulting suspension was stirred at the same temperature for 1h. The resulting green solution was cooled to  $-78^\circ\text{C}$  and silica gel (c.a. 600 mg) was added. The resulting mixture was stirred at  $-78^\circ\text{C}$  for 15 min and at room temperature for 2 h, then filtered through a short pad of silica gel with  $\text{CH}_2\text{Cl}_2$  as eluent. The filtrate was concentrated and the resulting residue was purified by silica gel column chromatography (eluent: *n*-hexane/ether = 1/0 – 15/1) to give aldehyde **5** as a colorless solid (224.7 mg, 0.98 mmol, 84% yield).

**5-3. Direct catalytic asymmetric aldol reaction of aldehyde **5** with (*R*)-catalyst.**

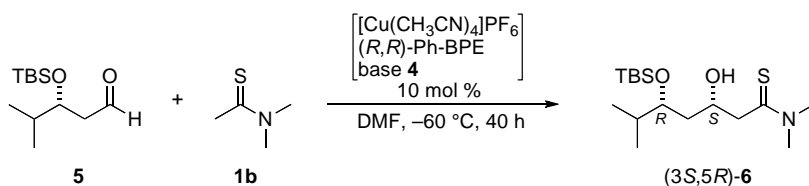

To a flame-dried 20 mL test tube equipped with a magnetic stirring bar and a 3-way-top were added (*R,R*)-Ph-BPE/Cu solution (0.1 M/THF, 180  $\mu\text{L}$ , 0.018 mmol, prepared by following the procedure described in section 4), dry DMF (1.8 mL), *N,N*-dimethylthioacetamide (**1b**) (21.8 mg, 0.211 mmol, 500  $\mu\text{L}$  in DMF) and

Direct Catalytic Asymmetric Aldol Reactions of Thioamides: Toward a Stereocontrolled Synthesis of 1,3-polyols

aldehyde **5** (40.5 mg, 0.176 mmol, 500  $\mu$ L in DMF) under Ar at room temperature. The test tube was immersed into the electronically-controlled cooling bath at  $-60$   $^{\circ}$ C with 2-propanol as medium. To the solution was added lithium 2,2,5,7,8-Pentamethylchromanolate (0.2M/THF, 90  $\mu$ L, 0.018 mmol, prepared by following the procedure described in section 4) and stirred at  $-60$   $^{\circ}$ C. After 40 h of stirring, sat.  $\text{NH}_4\text{Cl}$  aq. and bipyridine (8.4 mg) were added to the reaction mixture (essential to make sure the dissociation of the product from Cu complex) and aqueous layer was extracted with ethyl acetate. The combined organic layers were washed with brine, then dried over  $\text{Na}_2\text{SO}_4$ . Filtrate was concentrated under reduced pressure and the resulting crude residue was submitted to the NMR analysis to determine diastereomeric ratio (*syn/anti* = 95/5,  $^1\text{H}$  NMR ( $\text{C}_6\text{D}_6$ ): *syn*  $\delta$  4.07 ( $(\text{CH}_3)_2\text{CHCH}(\text{OTBS})\text{CH}_2\text{..}$ ); *anti*  $\delta$  4.23 ( $(\text{CH}_3)_2\text{CHCH}(\text{OTBS})\text{CH}_2\text{..}$ )). The crude material was purified by silica gel column chromatography (eluent: *n*-hexane/ethyl acetate = 15/1 – 5/1) to give aldol product as a pale yellow oil (45.6 mg, 0.137 mmol, 78% yield, 99% ee). Enantiomeric excess was determined by HPLC analysis. Relative configuration was determined after converting the each diastereomer to the corresponding di-TBS protected aldehyde **S2**. Chemical shifts in  $^1\text{H}$  NMR of **S2** matched to those of *syn*-**S2** reported in the literature.<sup>S1</sup>

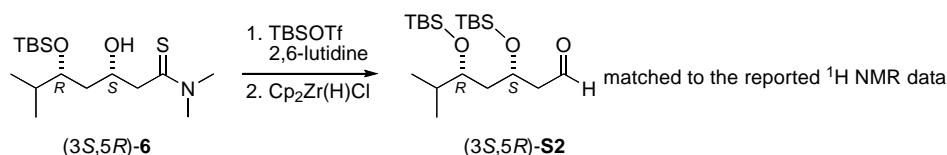

#### (3S,5R)-*N,N*-Dimethyl-5-(*tert*-butyldimethylsilyloxy)-3-hydroxy-6-methylheptanethioamide ((3S,5R)-**6**)

Pale yellow oil; IR (KBr)  $\nu$  3406, 2955, 2929, 2856, 1519  $\text{cm}^{-1}$ ;  $^1\text{H}$  NMR ( $\text{C}_6\text{D}_6$ )  $\delta$  4.60 (brs, 1H), 4.54-4.48 (m, 1H), 4.07 (ddd,  $J$  = 7.6, 5.5, 3.4 Hz, 1H), 2.91 (s, 3H), 2.34 (dd,  $J$  = 15.9, 8.7 Hz, 1H), 2.27 (dd,  $J$  = 15.9, 2.4 Hz, 1H), 2.13 (s, 3H), 1.19-1.93 (m, 1H), 1.89 (ddd,  $J$  = 13.9, 9.8, 5.5 Hz, 1H), 1.70 (ddd,  $J$  = 13.9, 7.6, 3.4 Hz, 1H), 1.03 (d,  $J$  = 6.7 Hz, 3H), 1.02 (s, 9H), 0.94 (d,  $J$  = 7.0 Hz, 3H), 0.22 (s, 3H),  $-0.12$  (s, 3H);  $^{13}\text{C}$  NMR ( $\text{C}_6\text{D}_6$ )  $\delta$  201.4, 74.6, 67.9, 49.2, 43.4, 41.2, 40.3, 32.1, 26.2, 19.3, 18.4, 16.4,  $-4.0$ ,  $-4.4$ ;  $[\alpha]_{\text{D}}^{24}$   $+65.7$  ( $c$  2.0,  $\text{CHCl}_3$ , 99% ee sample); ESI-MS  $m/z$  356  $[\text{M}+\text{Na}]^+$ ; HRMS (ESI-TOF) Anal. calcd. for  $\text{C}_{16}\text{H}_{35}\text{NNaO}_2\text{SiS}$   $m/z$  356.2050  $[\text{M}+\text{Na}]^+$ , found 356.2056; HPLC: Daicel CHIRALPAK IC ( $\phi$  0.46 cm  $\times$  25 cm), 2-propanol/*n*-hexane = 1/9, flow rate 1.0 mL/min, detection 254 nm,  $t_{\text{R}}$  = 6.7 min (minor), 12.1 min (major).

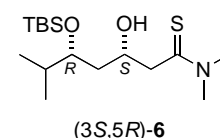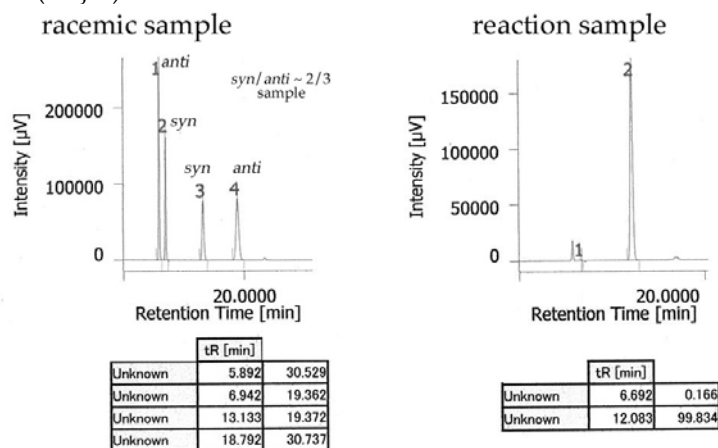

#### 5-4. Direct catalytic asymmetric aldol reaction of aldehyde **5** with (*S*)-catalyst.

To a flame-dried 20 mL test tube equipped with a magnetic stirring bar and a 3-way-top were added (*S,S*)-Ph-BPE/Cu solution (0.1 M/THF, 180  $\mu$ L, 0.018 mmol, prepared by following the procedure described

<sup>S1</sup> Evans, D. A.; Chapman, K. T.; Carreira, E. M. *J. Am. Chem. Soc.* **1988**, 110, 3560.

Direct Catalytic Asymmetric Aldol Reactions of Thioamides: Toward a Stereocontrolled Synthesis of 1,3-polyols in section 4), dry DMF (1.8 mL), *N,N*-dimethylthioacetamide (**1b**) (21.8 mg, 0.211 mmol, 500  $\mu$ L in DMF) and aldehyde **5** (40.5 mg, 0.176 mmol, 500  $\mu$ L in DMF) under Ar at room temperature. The test tube was immersed into the electronically-controlled cooling bath at  $-60$   $^{\circ}$ C with 2-propanol as medium. To the solution was added lithium 2,2,5,7,8-Pentamethylchromanolate (0.2M/THF, 90  $\mu$ L, 0.018 mmol, prepared by following the procedure described in section 4) and stirred at  $-60$   $^{\circ}$ C. After 40 h of stirring, sat.  $\text{NH}_4\text{Cl}$  aq. and bipyridine (8.4 mg) were added to the reaction mixture (essential to make sure the dissociation of the product from Cu complex) and aqueous layer was extracted with ethyl acetate. The combined organic layers were washed with brine, then dried over  $\text{Na}_2\text{SO}_4$ . Filtrate was concentrated under reduced pressure and the resulting crude residue was submitted to the NMR analysis to determine diastereomeric ratio (*syn*/*anti* = 11/89,  $^1\text{H}$  NMR ( $\text{C}_6\text{D}_6$ ): *syn*  $\delta$  4.07 ( $(\text{CH}_3)_2\text{CHCH}(\text{OTBS})\text{CH}_2\text{..}$ ); *anti*  $\delta$  4.23 ( $(\text{CH}_3)_2\text{CHCH}(\text{OTBS})\text{CH}_2\text{..}$ ). The crude material was purified by silica gel column chromatography (eluent: *n*-hexane/ethyl acetate = 15/1 – 5/1) to give aldol product as a pale yellow oil (41.7 mg, 0.125 mmol, 71% yield, 99% ee). Enantiomeric excess was determined by HPLC analysis. Relative configuration was determined after converting the major diastereomer to the corresponding di-TBS protected aldehyde **S2**. Chemical shifts in  $^1\text{H}$  NMR of **S2** matched to those of *anti*-**S2** reported in the literature.<sup>S1</sup>

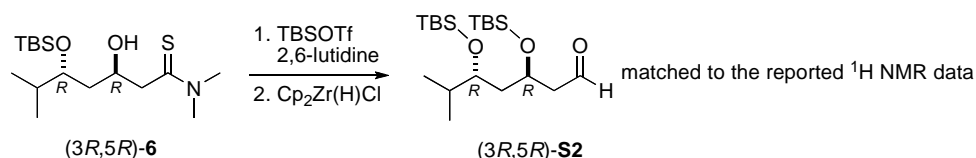

### (3*R*,5*R*)-*N,N*-Dimethyl-5-(*tert*-butyldimethylsilyloxy)-3-hydroxy-6-methylheptanethioamide ((3*R*,5*R*)-**6**)

Pale yellow oil; IR (KBr)  $\nu$  3418, 3083, 2959, 2874, 1643  $\text{cm}^{-1}$ ;  $^1\text{H}$  NMR ( $\text{C}_6\text{D}_6$ )  $\delta$  4.78 (brs, 1H), 4.68–4.62 (m, 1H), 4.23 (ddd,  $J$  = 9.5, 4.0, 2.2 Hz, 1H), 2.88 (s, 3H), 2.22 (dd,  $J$  = 16.2, 9.4 Hz, 1H), 2.09 (dd,  $J$  = 16.2, 1.1 Hz, 1H), 2.03 (s, 3H), 1.94–1.88 (m, 1H), 1.67 (ddd,  $J$  = 13.4, 10.7, 2.2 Hz, 1H), 1.50–1.44 (m, 1H), 1.08 (s, 9H), 1.04 (d,  $J$  = 7.1 Hz, 3H), 0.97 (d,  $J$  = 7.0 Hz, 3H), 0.39 (s, 3H), 0.19 (s, 3H);  $^{13}\text{C}$  NMR ( $\text{C}_6\text{D}_6$ )  $\delta$  201.7, 73.3, 66.0, 49.1, 43.3, 40.0, 39.2, 34.5, 26.3, 18.5, 18.4, 17.1,  $-4.0$ ,  $-4.3$ ;  $[\alpha]_{\text{D}}^{24}$   $-50.2$  ( $c$  1.3,  $\text{CHCl}_3$ , 99% ee sample); ESI-MS  $m/z$  356  $[\text{M}+\text{Na}]^+$ ; HRMS (ESI-TOF) Anal. calcd. for  $\text{C}_{16}\text{H}_{35}\text{NNaO}_2\text{SiS}$   $m/z$  356.2050  $[\text{M}+\text{Na}]^+$ , found 356.2047; HPLC: Daicel CHIRALPAK IC ( $\phi$  0.46 cm  $\times$  25 cm), 2-propanol/*n*-hexane = 1/9, flow rate 1.0 mL/min, detection 254 nm,  $t_{\text{R}}$  = 5.7 min (major), 16.2 min (minor).

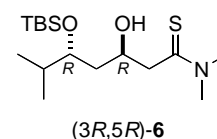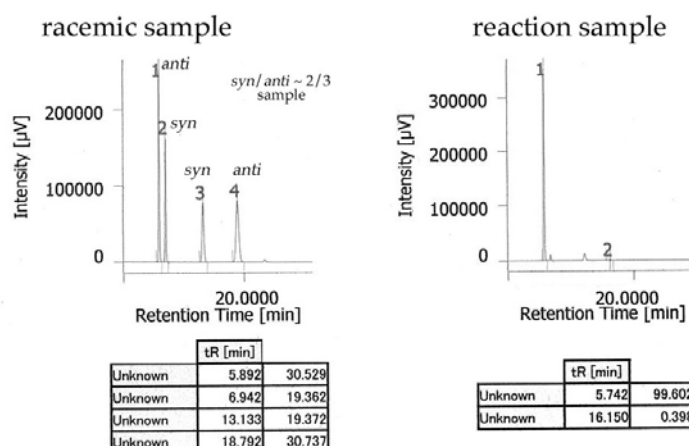

### 6. Determination of the Absolute Configuration of Aldol Products 3

Synthesis of (–)-(S)-**3ba** and (–)-(S)-**S3** through auxiliary approach was reported (Cinquini, M.; Manfredi, A.; Molinari, H.; Restelli, A. *Tetrahedron* **1985**, 41, 4929). The optical rotation of **3ba** prepared from (*R*)-catalyst in Table 2, entry 2 was  $[\alpha]_{\text{D}}^{22}$  +147.7, indicating that the absolute configuration of **3ba** prepared in our protocol

Direct Catalytic Asymmetric Aldol Reactions of Thioamides: Toward a Stereocontrolled Synthesis of 1,3-polyols is (+)-(*R*)-**3ba** as shown below. The direct aldol reaction of pivalaldehyde (**2b**) and *N,N*-dimethylthioacetamide (**1b**) with (*R*)-catalyst gave the corresponding aldol product **S2** with 87% ee and (+) optical rotation, indicating that the absolute configuration of **S3** produced by the present protocol was (+)-(*R*).

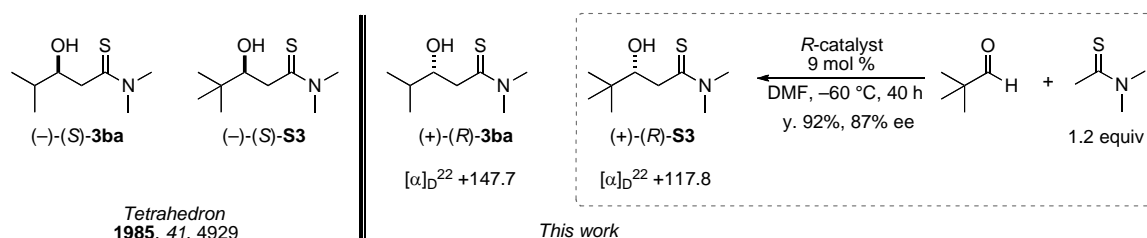

Product **3aa** derived from *N,N*-diallylthioacetamide (**1a**) was converted to the aldehyde **5**. The optical rotation of **5** prepared from **3aa** and **3ba** was nearly identical, indicating that the absolute configuration of the aldol product from *N,N*-diallylthioacetamide (**1a**) was identical to that obtained from *N,N*-dimethylthioacetamide (**1b**).

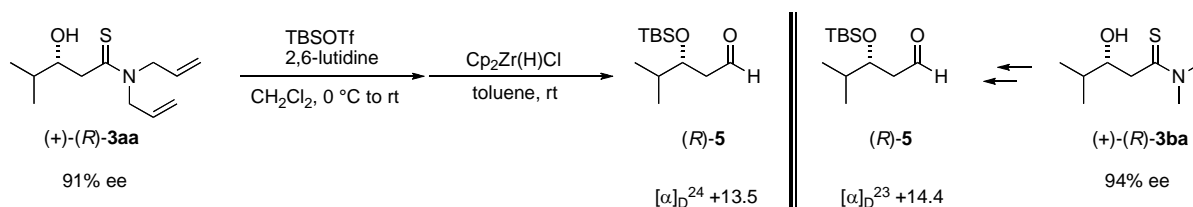

The sign of the optical rotation of other aldol products was uniformly (+). The absolute configuration of the other aldol products **3** in Table 2 was deduced by analogy.

## 7. NMR & MS Analyses of Catalyst-Product Complex

In the direct aldol reaction of *N,N*-diallylthioacetamide (**1a**) and isobutyraldehyde (**2a**) in THF solvent with 10 mol % of catalyst (Table 1, entry 1), sampling a small aliquot of the reaction mixture followed by TLC analysis showed no spots corresponding to the desired product **3aa**, likely due to the tight complexation of the product and catalyst ((*R,R*)-Ph-BPE/Cu complex). As shown in Figure S1 (a), <sup>1</sup>H NMR of a mixture of (*R,R*)-Ph-BPE/[Cu(CH<sub>3</sub>CN)<sub>4</sub>]PF<sub>6</sub> : **3aa** = 1:1 in CDCl<sub>3</sub>, broad peaks were observed, suggesting that the formation of the Cu complex. In ESI MS spectrum of the mixture (Figure S1 (d)), (*R,R*)-Ph-BPE/[Cu(CH<sub>3</sub>CN)<sub>4</sub>]PF<sub>6</sub>/**3aa** = 1:1 complex was most prominently observed and the intensity of the peak derived from free **3aa** was weak, indicating that the complexation of (*R,R*)-Ph-BPE/Cu complex and **3aa** was sufficiently strong, and would arrest the catalytic turnover. In Figure S1 (f), the addition of pyridine would somewhat effective for releasing the **3aa** from (*R,R*)-Ph-BPE/Cu complex, however, the population of (*R,R*)-Ph-BPE/Cu/**3aa** complex was still high. The beneficial effect of pyridine for catalytic turnover in (Table 2, entry 2 and 3) would be come from the competitive coordination of pyridine to (*R,R*)-Ph-BPE/Cu complex. As shown in Figure S1 (b) and (e), by the addition of 3 equivalents of bipyridine, **3aa** was completely released from (*R,R*)-Ph-BPE/Cu complex, showing a (*R,R*)-Ph-BPE/Cu/bipyridine complex and free **3aa** in <sup>1</sup>H NMR and ESI MS. Bipyridine was used to make sure the release of the aldol product from the (*R,R*)-Ph-BPE/Cu complex in the work-up procedure as described above.

(a)  $^1\text{H}$  NMR of (*R,R*)-Ph-BPE/Cu : **3aa** = 1:1 in  $\text{CDCl}_3$ 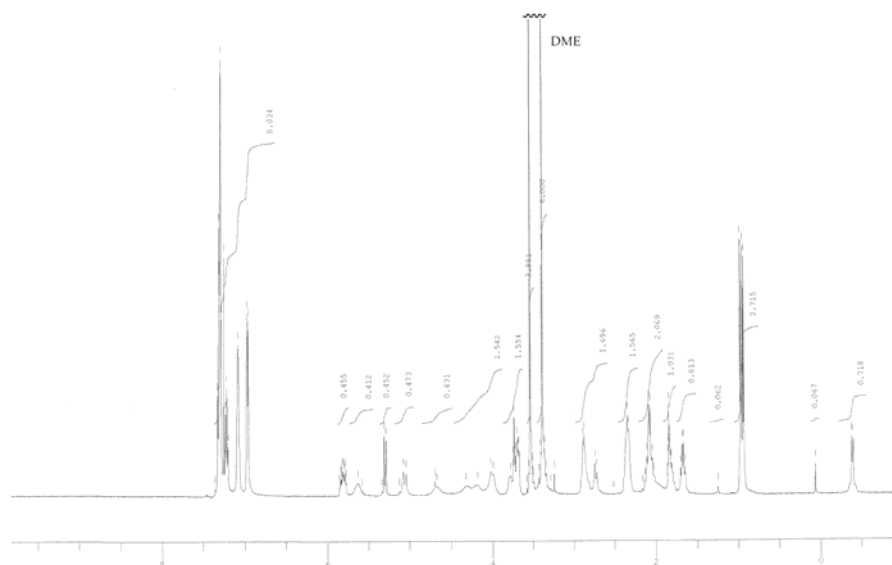(b)  $^1\text{H}$  NMR of the above mixture in  $\text{CDCl}_3$  after treatment with 5 equivalents of bipyridine.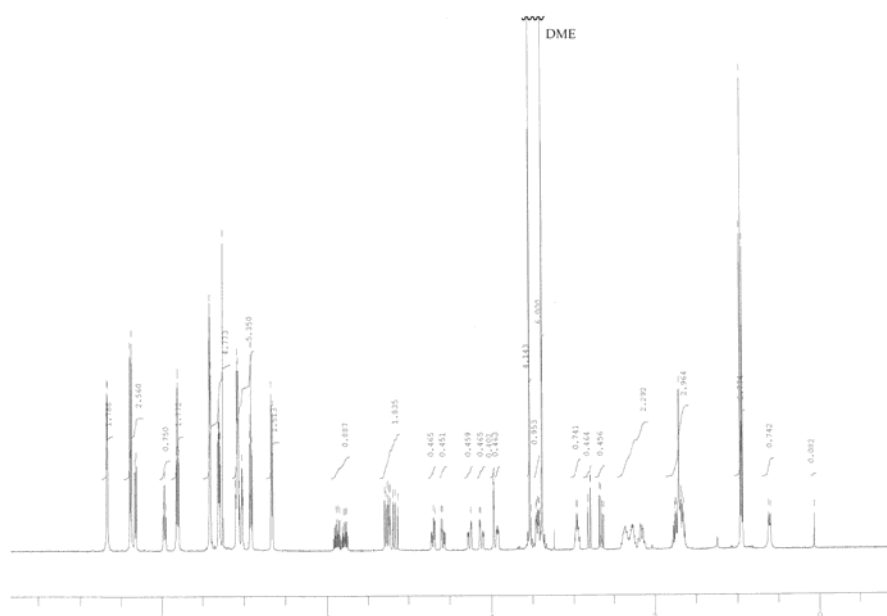(c)  $^1\text{H}$  NMR of **3aa** in  $\text{CDCl}_3$ 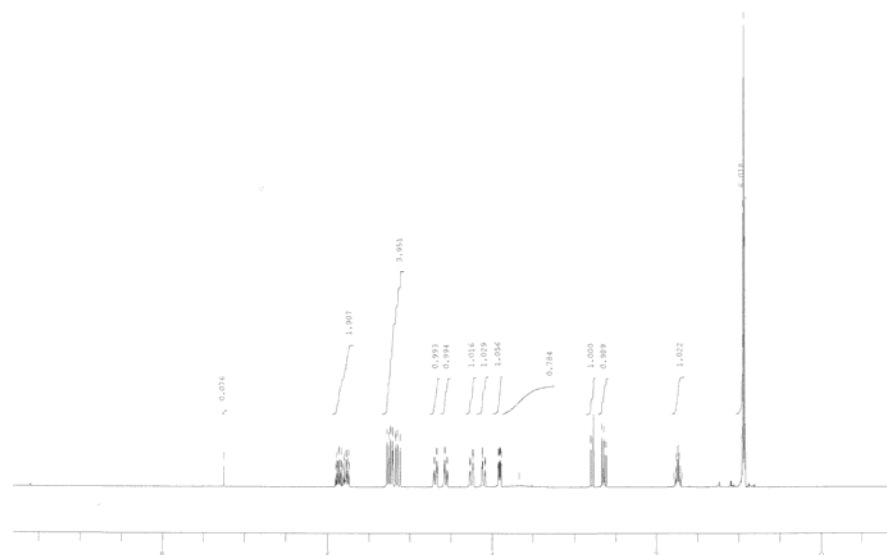



(d) ESI MS (positive ion mode) of  $(R,R)$ -Ph-BPE/Cu : **3aa** = 1:1.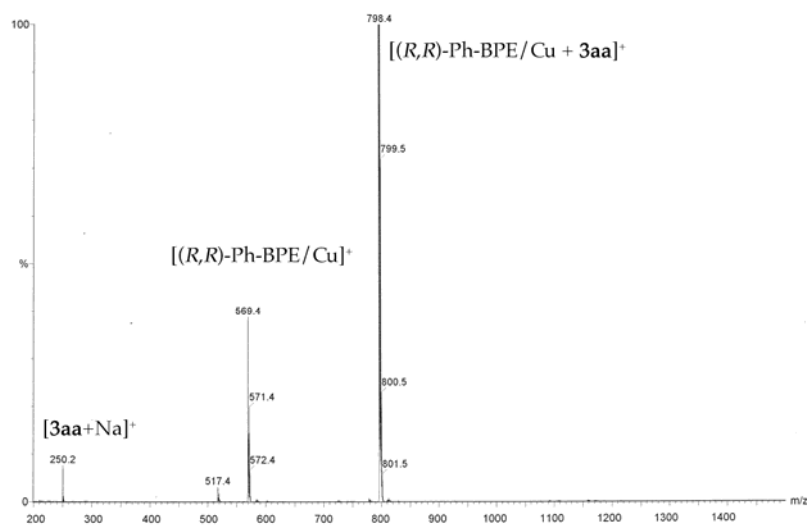(e) ESI MS (positive ion mode) of  $(R,R)$ -Ph-BPE/Cu : **3aa** : bipyridine = 1:1:3.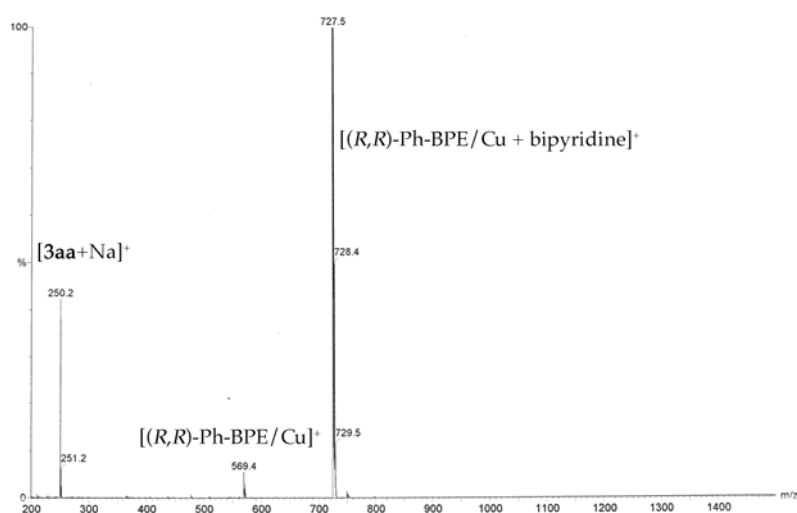(f) ESI MS (positive ion mode) of  $(R,R)$ -Ph-BPE/Cu : **3aa** : pyridine = 1:1:3.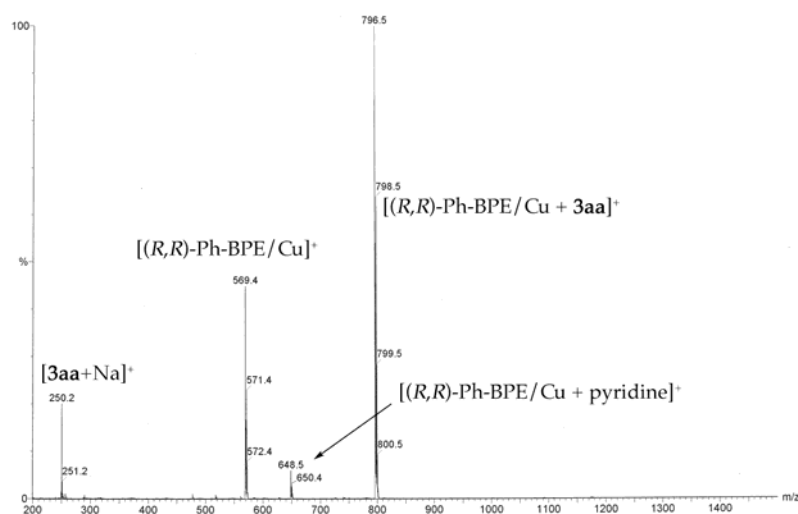

Figure S1.

**8. Estimation of pKa of Pentamethylchromanol by DFT Calculation**

Calculations were performed on Jaguar version 7.0 released in 2007 (Jaguar version 7.0, Schrödinger, LLC, New York, NY, 2007) using the B3LYP level of density functional theory.<sup>S2</sup> The 6-31G+(d,p) basis set of Pople and coworkers was used.<sup>S3</sup>

Geometry optimization of 2,2,5,7,8-pentamethylchromanol.

Input geometry:

| atom | angstroms     |               |               |
|------|---------------|---------------|---------------|
|      | x             | y             | z             |
| C1   | -2.3669160000 | -0.2128210000 | 0.2147680000  |
| C2   | -3.1824290000 | 1.0040760000  | 0.5321580000  |
| C3   | -4.5396300000 | 0.9600530000  | 0.4367290000  |
| C4   | -5.2157040000 | -0.3383670000 | 0.1295650000  |
| C5   | -4.4856840000 | -1.4839990000 | 0.0281360000  |
| C6   | -2.9826190000 | -1.3922010000 | -0.0453750000 |
| O7   | -6.5955840000 | -0.3409590000 | 0.0130140000  |
| O8   | -0.9682530000 | -0.1915060000 | 0.2023630000  |
| C9   | -0.3958800000 | 1.0938360000  | 0.0319240000  |
| C10  | -0.9632390000 | 2.0887920000  | 1.0642890000  |
| H11  | -0.7765740000 | 1.6957920000  | 2.0890260000  |
| H12  | -0.4516810000 | 3.0735260000  | 0.9820830000  |
| C13  | -2.4630200000 | 2.2901350000  | 0.8904830000  |
| H14  | -2.8620430000 | 2.7001400000  | 1.8430620000  |
| H15  | -2.6355710000 | 3.0425750000  | 0.0907470000  |
| C16  | -0.5850570000 | 1.5854230000  | -1.4230710000 |
| H17  | -1.6573560000 | 1.6628730000  | -1.6959730000 |
| H18  | -0.1186410000 | 2.5846650000  | -1.5605200000 |
| H19  | -0.1130840000 | 0.8730330000  | -2.1333060000 |
| C20  | 1.1134900000  | 0.9483360000  | 0.2899110000  |
| H21  | 1.6342450000  | 1.9229150000  | 0.1669760000  |
| H22  | 1.2972360000  | 0.5767840000  | 1.3212470000  |
| H23  | 1.5597190000  | 0.2177150000  | -0.4190010000 |
| C24  | -2.2109850000 | -2.4774980000 | -0.4104300000 |
| H25  | -2.7960710000 | -3.3380180000 | -0.7889000000 |
| H26  | -1.5275540000 | -2.2039430000 | -1.2447910000 |
| H27  | -1.6071280000 | -2.8219280000 | 0.4567470000  |
| C28  | -5.1025340000 | -2.7175380000 | 0.0509020000  |
| H29  | -4.5279280000 | -3.4283040000 | 0.6828380000  |
| H30  | -6.1091700000 | -2.6983200000 | 0.5212970000  |
| H31  | -5.1885190000 | -3.1183410000 | -0.9813480000 |
| C32  | -5.2987860000 | 2.0921750000  | 0.6468070000  |

<sup>S2</sup> B3LYP = Becke-3-Lee-Yang-Parr density functional theory. (a) Becke, A. D. *J. Chem. Phys.* **1993**, *98*, 1372. (b) Lee, C.; Yang, W.; Parr, R. G. *Phys. Rev. B* **1988**, *37*, 785.

<sup>S3</sup> (a) Ditchfield, R.; Hehre, W. J.; Pople, J. A. *J. Chem. Phys.* **1971**, *54*, 724. (b) Hehre, W. J.; Ditchfield, R.; Pople, J. A. *J. Chem. Phys.* **1972**, *56*, 2257. (c) Hariharan, P. C.; Pople, J. A. *Theor. Chim. Acta.* **1973**, *28*, 213.

|     |               |               |               |
|-----|---------------|---------------|---------------|
| H33 | -6.3864140000 | 1.9325070000  | 0.5069920000  |
| H34 | -5.1671140000 | 2.4570820000  | 1.6876130000  |
| H35 | -5.0085140000 | 2.8902460000  | -0.0696680000 |
| H36 | -6.8560490000 | -0.9982450000 | -0.6824370000 |

Final optimized geometry:

| atom | angstroms     |               |               |
|------|---------------|---------------|---------------|
|      | x             | y             | z             |
| C1   | -1.0352573572 | 0.5102254941  | -0.4071646233 |
| N2   | -0.1966412484 | -0.0005486915 | -1.3479941835 |
| O3   | -0.7503184435 | 1.4595032404  | 0.3056480205  |
| H4   | -0.5023402931 | -0.7000023139 | -2.0078247366 |
| H5   | 0.6616974115  | 0.5021163122  | -1.5262089221 |
| C6   | -2.3922932101 | -0.2205345814 | -0.2158900014 |
| C7   | -3.4891079217 | 0.8429676228  | -0.2897155591 |
| O8   | -4.2364215795 | 0.8537809561  | 0.8252102922  |
| O9   | -3.6809803277 | 1.5647868916  | -1.2458702864 |
| C10  | -5.3191902118 | 1.8162925025  | 0.8516803864  |
| H11  | -4.8936926764 | 2.8192420424  | 0.7489381187  |
| H12  | -5.9663693394 | 1.6380672355  | -0.0128891043 |
| C13  | -6.0533501957 | 1.6349904735  | 2.1666127854  |
| H14  | -6.4640609531 | 0.6233705077  | 2.2496459347  |
| H15  | -5.3830972182 | 1.8065430383  | 3.0148308497  |
| H16  | -6.8812346932 | 2.3494481481  | 2.2304859126  |
| C17  | -3.1654654908 | -3.5667388626 | -2.8592754012 |
| C18  | -3.2517067956 | -2.2612196274 | -3.3463968076 |
| C19  | -3.0140356740 | -1.1757845108 | -2.5021550457 |
| C20  | -2.6853723610 | -1.3839005917 | -1.1525156191 |
| C21  | -2.6029069811 | -2.6985860871 | -0.6739575001 |
| C22  | -2.8412163742 | -3.7824608487 | -1.5192532154 |
| H23  | -3.3528311256 | -4.4100356826 | -3.5187686549 |
| H24  | -3.5101829485 | -2.0843633152 | -4.3872398978 |
| H25  | -3.1005723011 | -0.1598409822 | -2.8753767907 |
| H26  | -2.3498385310 | -2.8733672312 | 0.3694436858  |
| H27  | -2.7752135011 | -4.7949808368 | -1.1293616722 |
| H28  | -2.3656755996 | -0.5931368631 | 0.8123235781  |

1176.296150614 hartrees

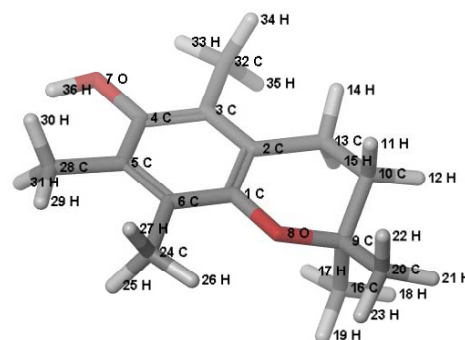

Calculation of pKa value of hydrogen 36H was performed on the obtained optimized geometry. The calculation was performed by following the method described in ref S3, using ab initio quantum chemical calculation on Jaguar 7.0 platform. Calculated pKa value of hydrogen 36H in H<sub>2</sub>O was 12.3.<sup>S4</sup> Experimentally determined pKa of 2-methoxyphenol is reported as 9.90 (calculated as 9.62),<sup>S5</sup> thus lithium salt of 2,2,5,7,8-pentamethylchromanol is much stronger base than lithium salt of 2-methoxyphenol.

<sup>S4</sup> Klicic, J. J.; Friensner, R. A.; Liu, S.-Y.; Guida, W. C. *J. Phys. Chem. A* **2002**, *106*, 1327.

<sup>S5</sup> Jover, J.; Bosque, R.; Sales, J. *QSAR Comb. Sci.* **2007**, *26*, 385.

## 9. Characterization of Aldol Products

**(R)-3-Hydroxy-*N,N*,4-trimethylpentanethioamide (3ba)**

Pale yellow oil; IR (KBr)  $\nu$  3309, 2959, 2875, 1670, 1523, 1395, 846  $\text{cm}^{-1}$ ;  $^1\text{H}$  NMR ( $\text{CDCl}_3$ )  $\delta$  4.05 (d,  $J = 2.7$  Hz, 1H), 3.95-3.92 (m, 1H), 3.50 (s, 3H), 3.32 (s, 3H), 2.77 (dd,  $J = 15.6, 0.9$  Hz, 1H), 2.63 (dd,  $J = 15.6, 9.9$  Hz, 1H), 1.83-1.73 (m, 1H), 0.98 (d,  $J = 6.7$  Hz, 3H), 0.97 (d,  $J = 7.0$  Hz, 3H);  $^{13}\text{C}$  NMR ( $\text{CDCl}_3$ )  $\delta$  202.3, 74.7, 45.8, 44.7, 41.9, 33.5, 18.9, 18.1;  $[\alpha]_{\text{D}}^{22} +147.7$  (c 1.3,  $\text{CHCl}_3$ , 94% ee sample); ESI-MS  $m/z$  198  $[\text{M}+\text{Na}]^+$ ; HRMS (ESI-TOF) Anal. calcd. for  $\text{C}_{16}\text{H}_{34}\text{N}_2\text{NaO}_2\text{S}_2$   $m/z$  373.1954  $[\text{2M}+\text{Na}]^+$ , found 373.1946; HPLC: CHIRALCEL OD-H ( $\phi$  0.46 cm x 25 cm), 2-propanol/*n*-hexane = 1/19, flow rate 1.0 mL/min, detection 254 nm,  $t_{\text{R}} = 9.5$  min (minor), 14.7 min (major).

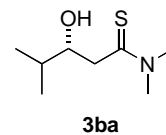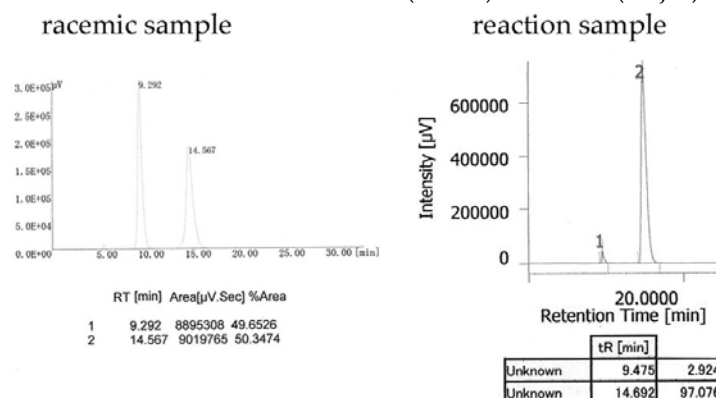**(R)-*N,N*-Diallyl-3-cyclohexyl-3-hydroxypropanethioamide (3ab)**

Colorless oil; IR (KBr)  $\nu$  3408, 2925, 2852, 1642, 1492  $\text{cm}^{-1}$ ;  $^1\text{H}$  NMR ( $\text{CDCl}_3$ )  $\delta$  5.88 (dddd,  $J = 17.1, 10.4, 6.0, 6.0$  Hz, 1H), 5.79 (dddd,  $J = 17.1, 9.9, 4.8, 4.8$  Hz, 1H), 5.30-5.14 (m, 4H), 4.70 (dd,  $J = 14.9, 6.0$  Hz, 1H), 4.59 (dd,  $J = 14.9, 6.0$  Hz, 1H), 4.29-4.23 (m, 1H), 4.15-4.09 (m, 1H), 3.93 (ddd,  $J = 9.9, 5.8, 1.8$  Hz, 1H), 3.15 (brs, 1H), 2.81 (dd,  $J = 15.6, 1.8$  Hz, 1H), 2.68 (dd,  $J = 15.6, 9.9$  Hz, 1H), 1.86-1.65 (m, 5H), 1.46-1.39 (m, 1H), 1.29-1.03 (m, 5H);  $^{13}\text{C}$  NMR ( $\text{CDCl}_3$ )  $\delta$  203.6, 130.6, 130.5, 118.7, 117.9, 74.1, 55.8, 52.9, 45.5, 43.3, 29.0, 28.3, 26.5, 26.3, 26.2;  $[\alpha]_{\text{D}}^{22} +84.1$  (c 1.1,  $\text{CHCl}_3$ , 92% ee sample); ESI-MS  $m/z$  290  $[\text{M}+\text{Na}]^+$ ; HRMS (ESI-TOF) Anal. calcd. for  $\text{C}_{15}\text{H}_{25}\text{NNaOS}$   $m/z$  290.1549  $[\text{M}+\text{Na}]^+$ , found 290.1544; HPLC: Daicel CHIRALCEL OD-H ( $\phi$  0.46 cm x 25 cm), 2-propanol/*n*-hexane = 1/99, flow rate 1.0 mL/min, detection 254 nm,  $t_{\text{R}} = 9.4$  min (minor), 12.5 min (major).

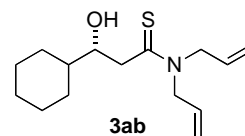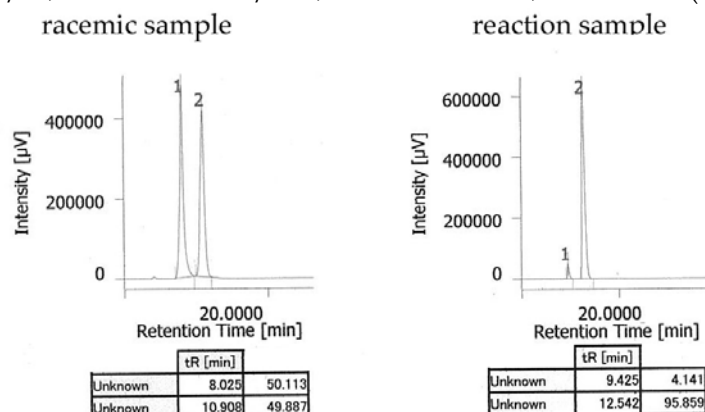**(R)-*N,N*-Diallyl-3-hydroxy-4,4-dimethylpentanethioamide (3ac)**

Colorless oil; IR (KBr)  $\nu$  3419, 3083, 2956, 2870, 1642  $\text{cm}^{-1}$ ;  $^1\text{H}$  NMR ( $\text{CDCl}_3$ )  $\delta$  5.89 (dddd,  $J = 17.1, 10.4, 6.0, 6.0$  Hz, 1H), 5.80 (dddd,  $J = 17.1, 10.4, 4.6, 4.6$  Hz, 1H),

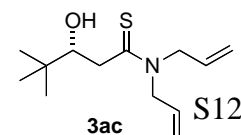

S12

5.31-5.15 (m, 4H), 4.72 (dd,  $J = 15.0, 5.8$  Hz, 1H), 4.58 (dd,  $J = 14.8, 6.0$  Hz, 1H), 4.32-4.25 (m, 1H), 4.15-4.08 (m, 1H), 3.79 (dd,  $J = 10.4, 1.6$  Hz, 1H), 2.89 (dd,  $J = 15.0, 1.6$  Hz, 1H), 2.67 (dd,  $J = 15.0, 10.4$  Hz, 1H), 2.65 (brs, 1H);  $^{13}\text{C}$  NMR ( $\text{CDCl}_3$ )  $\delta$  203.9, 130.6, 130.6, 118.6, 117.9, 77.6, 55.9, 52.9, 43.5, 34.7, 25.8;  $[\alpha]_{\text{D}}^{22} +70.0$  (c 1.1,  $\text{CHCl}_3$ , 92% ee sample); ESI-MS  $m/z$  290  $[\text{M}+\text{Na}]^+$ ; HRMS (ESI-TOF) Anal. calcd. for  $\text{C}_{13}\text{H}_{23}\text{NNaOS}$   $m/z$  264.1393  $[\text{M}+\text{Na}]^+$ , found 264.1388; HPLC: Daicel CHIRALCEL OD-H ( $\phi$  0.46 cm  $\times$  25 cm), 2-propanol/*n*-hexane = 1/99, flow rate 0.5 mL/min, detection 254 nm,  $t_{\text{R}} = 11.8$  min (minor), 16.4 min (major).

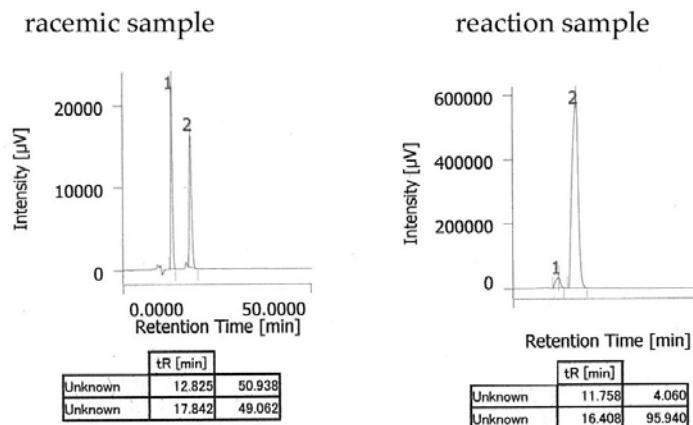

### (*R*)-5-(Benzyloxy)-3-hydroxy-*N,N*,4,4-tetramethylpentanethioamide (3bd)

Pale yellow oil; IR (KBr)  $\nu$  3405, 2960, 2871, 1521, 1102  $\text{cm}^{-1}$ ;  $^1\text{H}$  NMR ( $\text{CDCl}_3$ )  $\delta$  7.35-7.26 (m, 5H), 4.50 (s, 2H), 4.09 (dd,  $J = 10.0, 2.2$  Hz, 1H), 3.50 (s, 3H), 3.39 (d,  $J = 9.2$  Hz, 1H), 3.35 (d,  $J = 9.2$  Hz, 1H), 3.27 (s, 3H), 2.89 (dd,  $J = 14.4, 2.2$  Hz, 1H), 2.83 (dd,  $J = 14.4, 10.0$  Hz, 1H), 1.01 (s, 3H), 0.96 (s, 3H);  $^{13}\text{C}$  NMR ( $\text{CDCl}_3$ )  $\delta$  202.6, 138.3, 128.3, 127.5, 127.5, 78.4, 76.2, 73.5, 44.6, 44.5, 41.9, 38.7, 21.9, 20.5;  $[\alpha]_{\text{D}}^{25} +57.8$  (c 1.1,  $\text{CHCl}_3$ , 84% ee sample); ESI-MS  $m/z$  318  $[\text{M}+\text{Na}]^+$ ; HRMS (ESI-TOF) Anal. calcd. for  $\text{C}_{16}\text{H}_{25}\text{NNaO}_2\text{S}$   $m/z$  318.1498  $[\text{M}+\text{Na}]^+$ , found 318.1501; HPLC: Daicel CHIRALCEL OD-H ( $\phi$  0.46 cm  $\times$  25 cm), 2-propanol/*n*-hexane = 1/19, flow rate 1.0 mL/min, detection 254 nm,  $t_{\text{R}} = 11.2$  min (minor), 15.1 min (major).

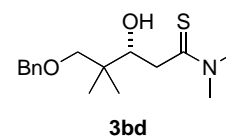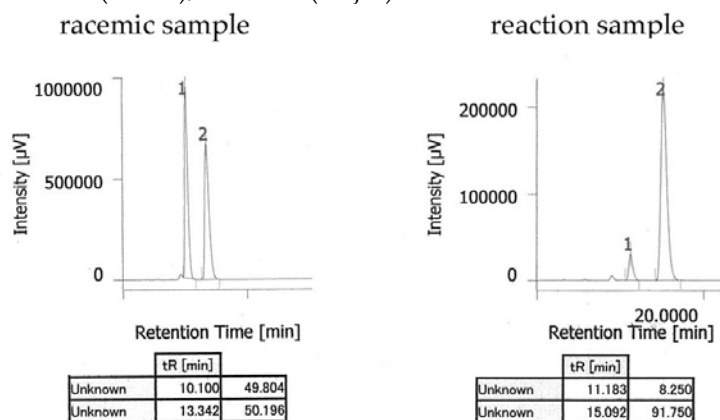

### (*S*)-*N,N*-Diallyl-3-hydroxydecanethioamide (3ae)

Pale yellow oil; IR (KBr)  $\nu$  3408, 3084, 2925, 2854, 1642  $\text{cm}^{-1}$ ;  $^1\text{H}$  NMR ( $\text{CDCl}_3$ )  $\delta$  5.87 (dddd,  $J = 17.1, 10.5, 5.9, 5.9$  Hz, 1H), 5.77 (dddd,  $J = 17.1, 10.4, 4.9, 4.9$  Hz, 1H), 5.30-5.13 (m, 4H), 4.69 (dd,  $J = 14.9, 5.9$  Hz, 1H), 4.58 (dd,  $J = 14.9, 5.9$  Hz, 1H), 4.27-4.20 (m, 1H), 4.19-4.10 (m, 3H), 2.76 (dd,  $J = 15.9, 1.9$  Hz, 1H), 2.63 (dd,  $J = 15.9, 9.6$  Hz, 1H), 1.60-1.26 (m, 12H), 0.88-0.86 (m, 3H);  $^{13}\text{C}$  NMR ( $\text{CDCl}_3$ )  $\delta$  203.0, 130.6, 130.4, 118.7, 117.9, 69.9, 55.6, 52.8, 47.9, 36.6, 31.8, 29.6, 29.2, 25.6, 22.6, 14.1;  $[\alpha]_{\text{D}}^{23} +74.0$  (c 1.3,  $\text{CHCl}_3$ , 89% ee

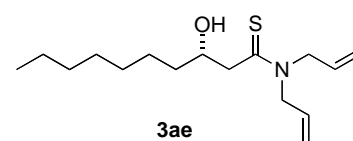

Direct Catalytic Asymmetric Aldol Reactions of Thioamides: Toward a Stereocontrolled Synthesis of 1,3-polyols sample); ESI-MS  $m/z$  306  $[M+Na]^+$ ; HRMS (ESI-TOF) Anal. calcd. for  $C_{16}H_{29}NNaOS$   $m/z$  306.1862  $[M+H]^+$ , found 306.1859; HPLC: Daicel CHIRALCEL OD-H ( $\phi$  0.46 cm x 25 cm), 2-propanol/*n*-hexane = 1/19, flow rate 0.5 mL/min, detection 254 nm,  $t_R$  = 10.4 min (minor), 12.5 min (major).

racemic sample

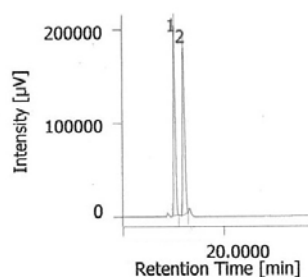

|         | tR [min] |        |
|---------|----------|--------|
| Unknown | 10.175   | 49.686 |
| Unknown | 12.000   | 50.314 |

reaction sample

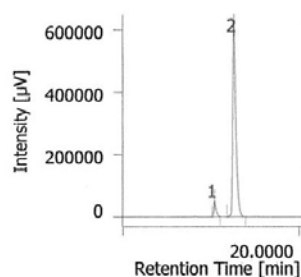

|         | tR [min] |        |
|---------|----------|--------|
| Unknown | 10.375   | 5.714  |
| Unknown | 12.542   | 94.286 |

### (S)-N,N-Diallyl-4-cyclohexyl-3-hydroxybutanethioamide (3af)

Colorless oil; IR (KBr)  $\nu$  3419, 3082, 2922, 2849, 1643  $cm^{-1}$ ;  $^1H$  NMR ( $CDCl_3$ )  $\delta$  5.88 (dddd,  $J$  = 17.1, 10.1, 5.8, 5.8 Hz, 1H), 5.77 (dddd,  $J$  = 17.1, 10.4, 4.6, 4.6 Hz, 1H), 5.30-5.13 (m, 4H), 4.69 (dd,  $J$  = 14.7, 5.8 Hz, 1H), 4.59 (dd,  $J$  = 14.7, 5.8 Hz, 1H), 4.32-4.27 (m, 1H), 4.26-4.20 (m, 1H), 4.14-4.10 (m, 1H), 3.30 (brs, 1H), 2.71 (dd,  $J$  = 16.1, 2.0 Hz, 1H), 2.67 (dd,  $J$  = 16.1, 9.4 Hz, 1H), 1.85-1.83 (m, 1H), 1.70-1.62 (m, 4H), 1.56-1.47 (m, 2H), 1.29-1.10 (m, 4H), 0.98-0.82 (m, 2H);  $^{13}C$  NMR ( $CDCl_3$ )  $\delta$  203.1, 130.6, 130.5, 118.7, 118.0, 67.4, 55.6, 52.6, 48.3, 44.3, 34.1, 34.0, 32.9, 26.6, 26.3, 26.2;  $[\alpha]_D^{24}$  +84.9 ( $c$  1.2,  $CHCl_3$ , 90% ee sample); ESI-MS  $m/z$  304  $[M+Na]^+$ ; HRMS (ESI-TOF) Anal. calcd. for  $C_{16}H_{27}NNaOS$   $m/z$  304.1706  $[M+H]^+$ , found 304.1721; HPLC: Daicel CHIRALCEL OD-H ( $\phi$  0.46 cm x 25 cm), 2-propanol/*n*-hexane = 1/99, flow rate 1.0 mL/min, detection 254 nm,  $t_R$  = 9.6 min (minor), 16.7 min (major).

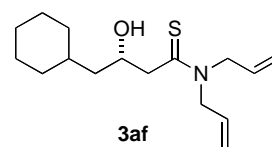

racemic sample

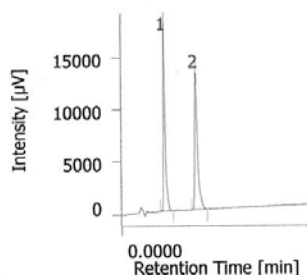

|         | tR [min] |        |
|---------|----------|--------|
| Unknown | 9.283    | 46.737 |
| Unknown | 16.242   | 53.263 |

reaction sample

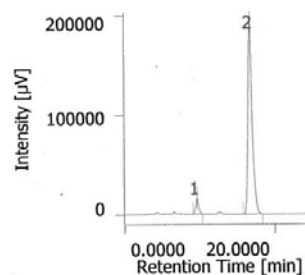

|         | tR [min] |        |
|---------|----------|--------|
| Unknown | 9.608    | 5.234  |
| Unknown | 16.683   | 94.766 |

### (S)-N,N-Diallyl-3-hydroxy-5-methylhexanethioamide (3ag)

Colorless oil; IR (KBr)  $\nu$  3407, 3084, 2954, 2925, 1642  $cm^{-1}$ ;  $^1H$  NMR ( $CDCl_3$ )  $\delta$  5.87 (dddd,  $J$  = 17.1, 10.4, 5.8, 5.8 Hz, 1H), 5.76 (dddd,  $J$  = 17.1, 10.4, 4.8, 4.8 Hz, 1H), 5.28-5.12 (m, 4H), 4.69 (dd,  $J$  = 14.7, 5.8 Hz, 1H), 4.58 (dd,  $J$  = 14.7, 5.8 Hz, 1H), 4.28-4.21 (m, 2H), 4.13-4.09 (m, 1H), 3.60 (brs, 1H), 2.71 (dd,  $J$  = 16.1, 2.0 Hz, 1H), 2.61 (dd,  $J$  = 16.1, 9.4 Hz, 1H), 1.88-1.78 (m, 1H), 1.57-1.51 (m, 1H), 1.19-1.14 (m, 1H), 0.92 (d,  $J$  = 6.4 Hz, 3H), 0.92 (d,  $J$  = 6.4 Hz, 3H);  $^{13}C$  NMR ( $CDCl_3$ )  $\delta$  202.9, 130.6, 130.5, 118.7, 117.9, 68.0, 55.6, 52.6, 48.3, 45.7, 24.4, 23.4, 22.1;  $[\alpha]_D^{23}$  +93.0 ( $c$  1.1,  $CHCl_3$ , 90% ee sample); ESI-MS  $m/z$  264  $[M+Na]^+$ ; HRMS (ESI-TOF) Anal. calcd. for  $C_{13}H_{23}NNaOS$   $m/z$  264.1393  $[M+H]^+$ , found 264.1396; HPLC: Daicel CHIRALCEL OD-H ( $\phi$  0.46 cm x 25 cm),

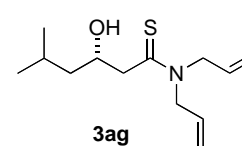

Direct Catalytic Asymmetric Aldol Reactions of Thioamides: Toward a Stereocontrolled Synthesis of 1,3-polyols  
 2-propanol/*n*-hexane = 1/99, flow rate 0.5 mL/min, detection 254 nm,  $t_R$  = 17.6 min (minor), 23.1 min (major).

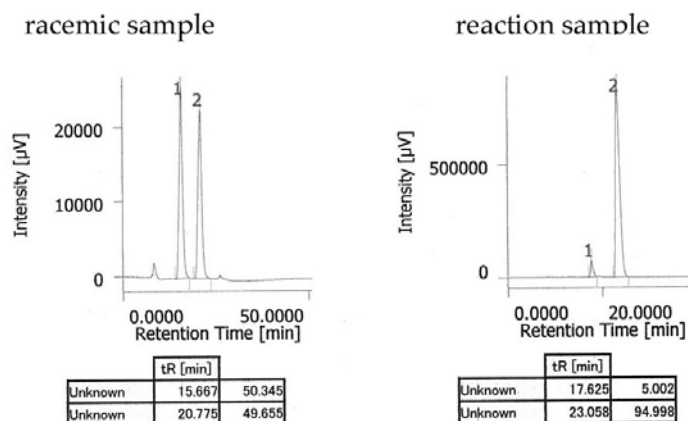

### (S)-*N,N*-Diallyl-3-hydroxy-5-phenylpentanethioamide (3ah)

Pale yellow oil; IR (KBr)  $\nu$  3406, 3025, 2925, 1721, 1642  $\text{cm}^{-1}$ ;  $^1\text{H}$  NMR ( $\text{CDCl}_3$ )  $\delta$  7.29-7.26 (m, 5H), 5.88 (dddd,  $J$  = 17.4, 10.4, 6.1, 6.1 Hz, 1H), 5.75 (dddd,  $J$  = 17.4, 10.1, 4.9, 4.9 Hz, 1H), 5.29-5.11 (m, 4H), 4.68 (dd,  $J$  = 15.0, 6.1 Hz, 1H), 4.60 (dd,  $J$  = 15.0, 6.1 Hz, 1H), 4.24-4.17 (m, 3H), 4.11-4.06 (m, 1H), 2.91-2.85 (m, 1H), 2.75 (dd,  $J$  = 15.9, 2.1 Hz, 1H), 2.75-2.70 (m, 1H), 2.66 (dd,  $J$  = 15.9, 9.2 Hz, 1H), 1.95-1.88 (m, 1H), 1.78-1.71 (m, 1H);  $^{13}\text{C}$  NMR ( $\text{CDCl}_3$ )  $\delta$  202.6, 142.1, 130.6, 130.4, 128.4, 128.4, 125.8, 118.8, 118.0, 69.2, 55.6, 52.8, 47.8, 38.3, 32.0;  $[\alpha]_D^{25}$  +56.3 (*c* 1.1,  $\text{CHCl}_3$ , 88% ee sample); ESI-MS  $m/z$  312  $[\text{M}+\text{Na}]^+$ ; HRMS (ESI-TOF) Anal. calcd. for  $\text{C}_{17}\text{H}_{23}\text{NNaOS}$   $m/z$  312.1393  $[\text{M}+\text{Na}]^+$ , found 312.1387; HPLC: Daicel CHIRALPAK IC ( $\phi$  0.46 cm  $\times$  25 cm), 2-propanol/*n*-hexane = 1/19, flow rate 1.0 mL/min, detection 254 nm,  $t_R$  = 26.3 min (minor), 30.8 min (major).

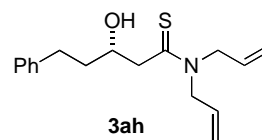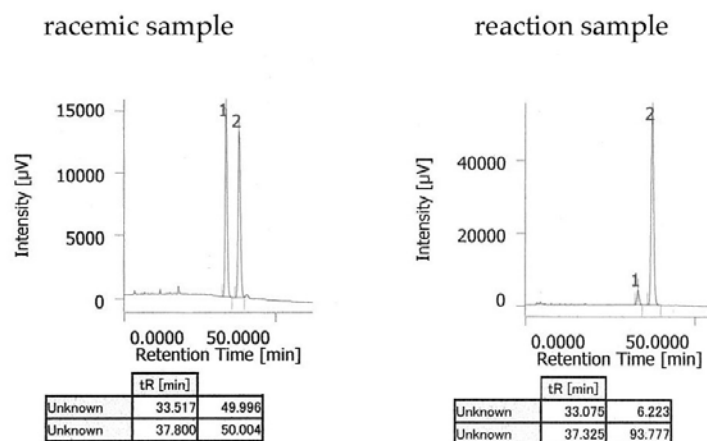

### (S)-10-(Diallylamino)-8-hydroxy-10-thioxodecyl benzoate (3ai)

Colorless oil; IR (KBr)  $\nu$  3414, 2929, 2856, 1717, 1276  $\text{cm}^{-1}$ ;  $^1\text{H}$  NMR ( $\text{CDCl}_3$ )  $\delta$  8.03 (d,  $J$  = 7.3 Hz, 2H), 7.54 (t,  $J$  = 7.9 Hz, 1H), 7.43 (dd,  $J$  = 7.9, 7.3 Hz, 2H), 5.88 (dddd,  $J$  = 16.8, 10.7, 6.0, 6.0 Hz, 1H), 5.77 (dddd,  $J$  = 17.1, 10.9, 4.5, 4.5 Hz, 1H), 5.81-5.73 (m, 1H), 5.29-5.13 (m, 4H), 4.69 (dd,  $J$  = 14.9, 6.0 Hz, 1H), 4.59 (dd,  $J$  = 14.9, 6.0 Hz, 1H), 4.31 (t,  $J$  = 6.6 Hz, 2H), 4.25-4.09 (m, 3H), 3.50 (brs, 1H), 2.75 (dd,  $J$  = 15.9, 1.5 Hz, 1H), 2.63 (dd,  $J$  = 15.9, 9.5 Hz, 1H), 1.79-1.73 (m, 2H), 1.61-1.34 (m, 10H);  $^{13}\text{C}$  NMR ( $\text{CDCl}_3$ )  $\delta$  202.9, 166.6, 132.7, 130.6, 130.5, 130.5, 129.5, 128.3, 118.7, 117.9, 69.8, 65.0, 55.6, 52.8, 47.9, 36.5, 29.4, 29.2, 28.7, 25.9, 25.5;  $[\alpha]_D^{25}$  +55.6 (*c* 1.2,  $\text{CHCl}_3$ , 90% ee sample); ESI-MS  $m/z$  264  $[\text{M}+\text{Na}]^+$ ; HRMS (ESI-TOF) Anal. calcd. for  $\text{C}_{23}\text{H}_{33}\text{NNaOS}$   $m/z$  426.2062  $[\text{M}+\text{Na}]^+$ , found 426.2081; HPLC: Daicel CHIRALCEL

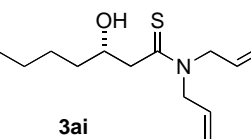

Direct Catalytic Asymmetric Aldol Reactions of Thioamides: Toward a Stereocontrolled Synthesis of 1,3-polyols  
 OD-H ( $\phi$  0.46 cm x 25 cm), 2-propanol/*n*-hexane = 1/19, flow rate 1.0 mL/min, detection 254 nm,  $t_R$  = 13.6 min (minor), 17.0 min (major).

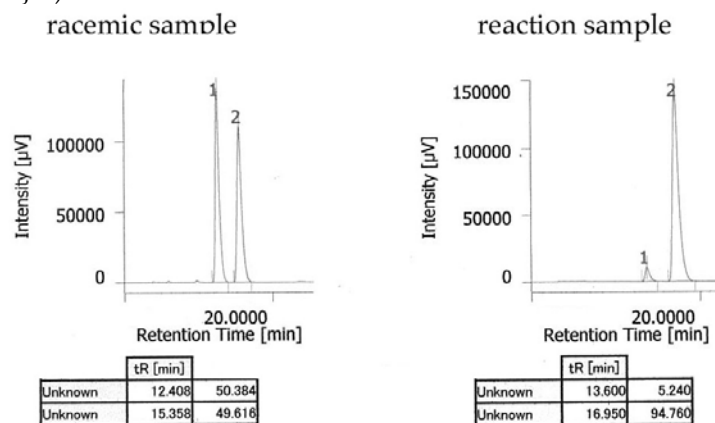

## 10. NMR Spectra of New Compounds



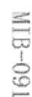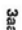

| DETE  | MIR-091:als             |
|-------|-------------------------|
| CCNT  | MIR-091                 |
| DATE  | Thu Oct 6 11:41:50 2009 |
| GENC  | IR                      |
| NAME  | non                     |
| OBFR  | 500.00 KHz              |
| OBST  | 150.00 KHz              |
| OBST  | 2150.00 Hz              |
| POINT | 32768                   |
| FREQ  | 10000.00 Hz             |
| SCAN  | 16                      |
| ACQTN | 3.2768 sec              |
| FW    | 3.7252 sec              |
| FDL   | 6.50 usec               |
| IRNIC | 29.2 c                  |
| STPR  | CDCL3                   |
| SVNT  | 7.25 ppm                |
| EXPR  | 0.22 Hz                 |
| RESIN | 14                      |

MTB-091--C

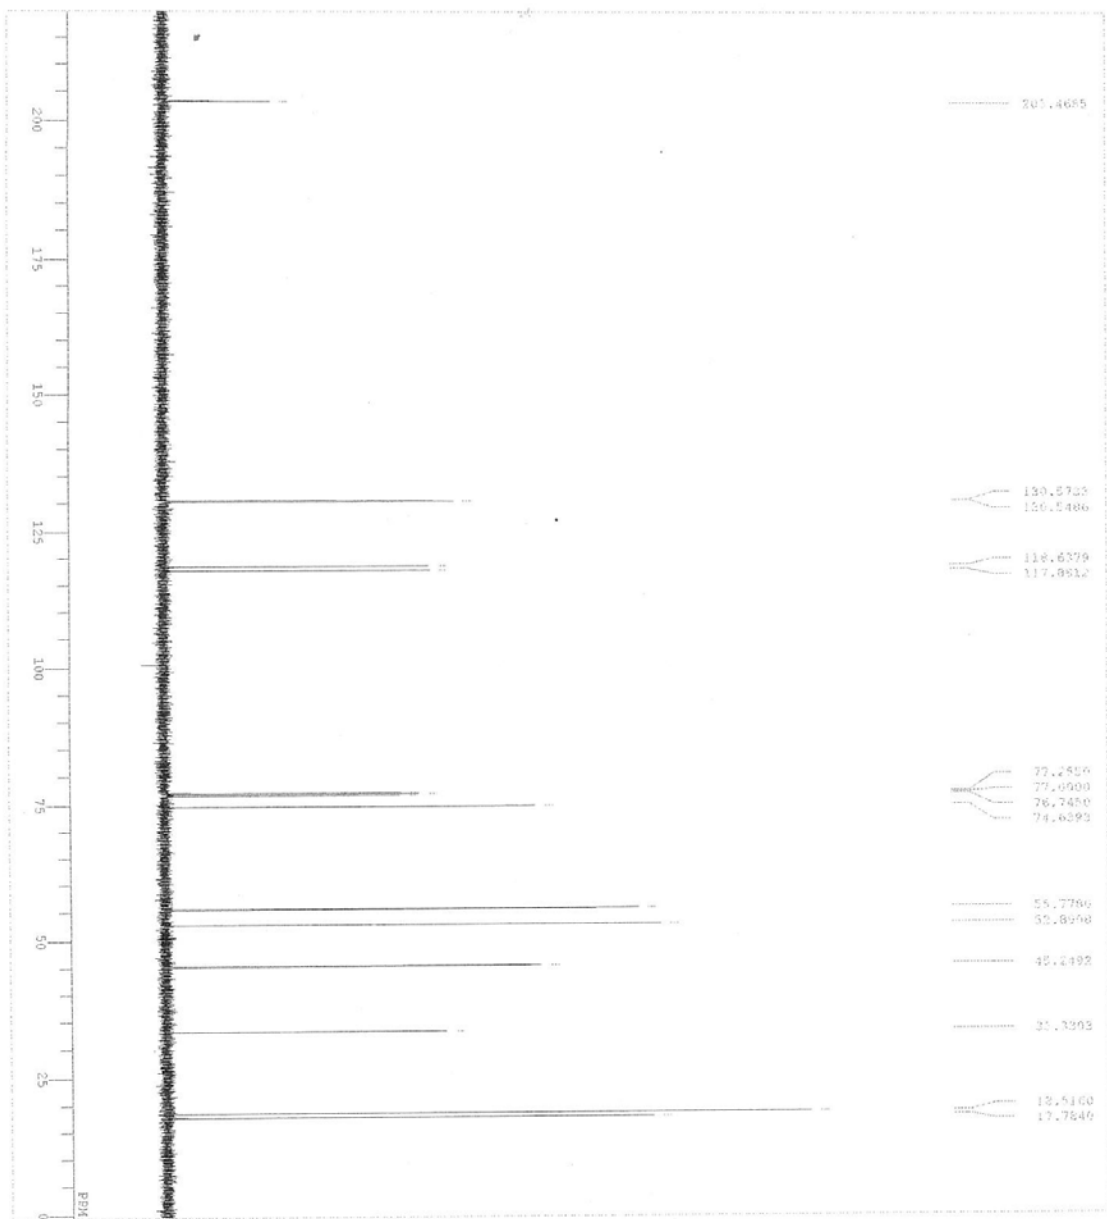

| DELT  | NEB-091C-modula     |
|-------|---------------------|
| CONNT | NEB-091C            |
| DAYTM | 13c                 |
| OBINC | Oct 6 12:28:54 2009 |
| EXMOD | bcm                 |
| OBFRQ | 125.65 MHz          |
| OBSET | 120.00 MHz          |
| OBFIN | 7958.00 Hz          |
| POINT | 32768               |
| FREQU | 33989.30 Hz         |
| SCANS | 111                 |
| ACQTM | 0.9667 sec          |
| FWL   | 2.0833 sec          |
| EMI   | 5.50 usec           |
| TRNRC | 1H                  |
| CLNRC | 30.0 c              |
| CLVNT | 71.00 ppm           |
| CLPZE | 0.22 Hz             |
| RGAIN | 31                  |

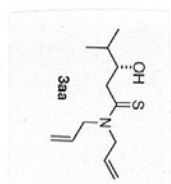

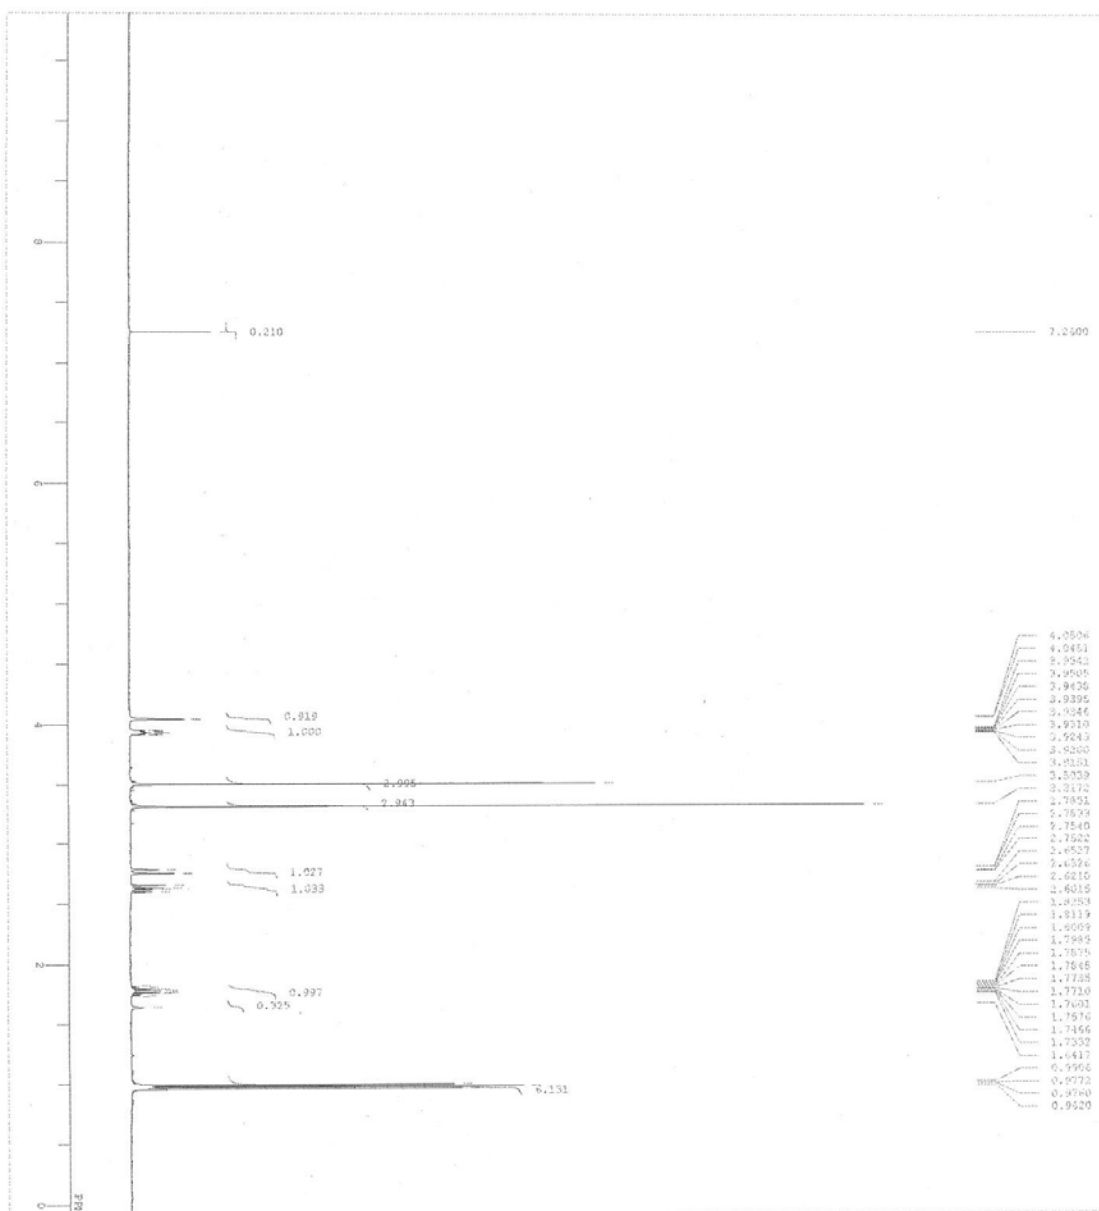

|        |                         |
|--------|-------------------------|
| DTITLE | MIB-075.maddala         |
| COUNT  | MIB-075                 |
| DATUM  | Fri Nov 6 11:13:11 2009 |
| CHRG   | IN                      |
| ORFNO  | 888                     |
| ORFST  | 500.00 ME               |
| OBST   | 160.00 ME               |
| OBTIN  | 2160.00 HZ              |
| PINT   | 32768                   |
| FREQD  | 10000.00 Hz             |
| SCANS  | 3                       |
| PR     | 3.276 sec               |
| PD     | 3.7232 sec              |
| PUL    | 6.50 usec               |
| TNAME  | 1H                      |
| CTEMP  | 27.6 C                  |
| SLEWT  | CCCL3                   |
| DELTA  | 7.36 MHz                |
| RF     | 0.15 Hz                 |
| POW1N  | 17                      |

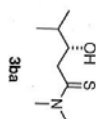

MB-075-C

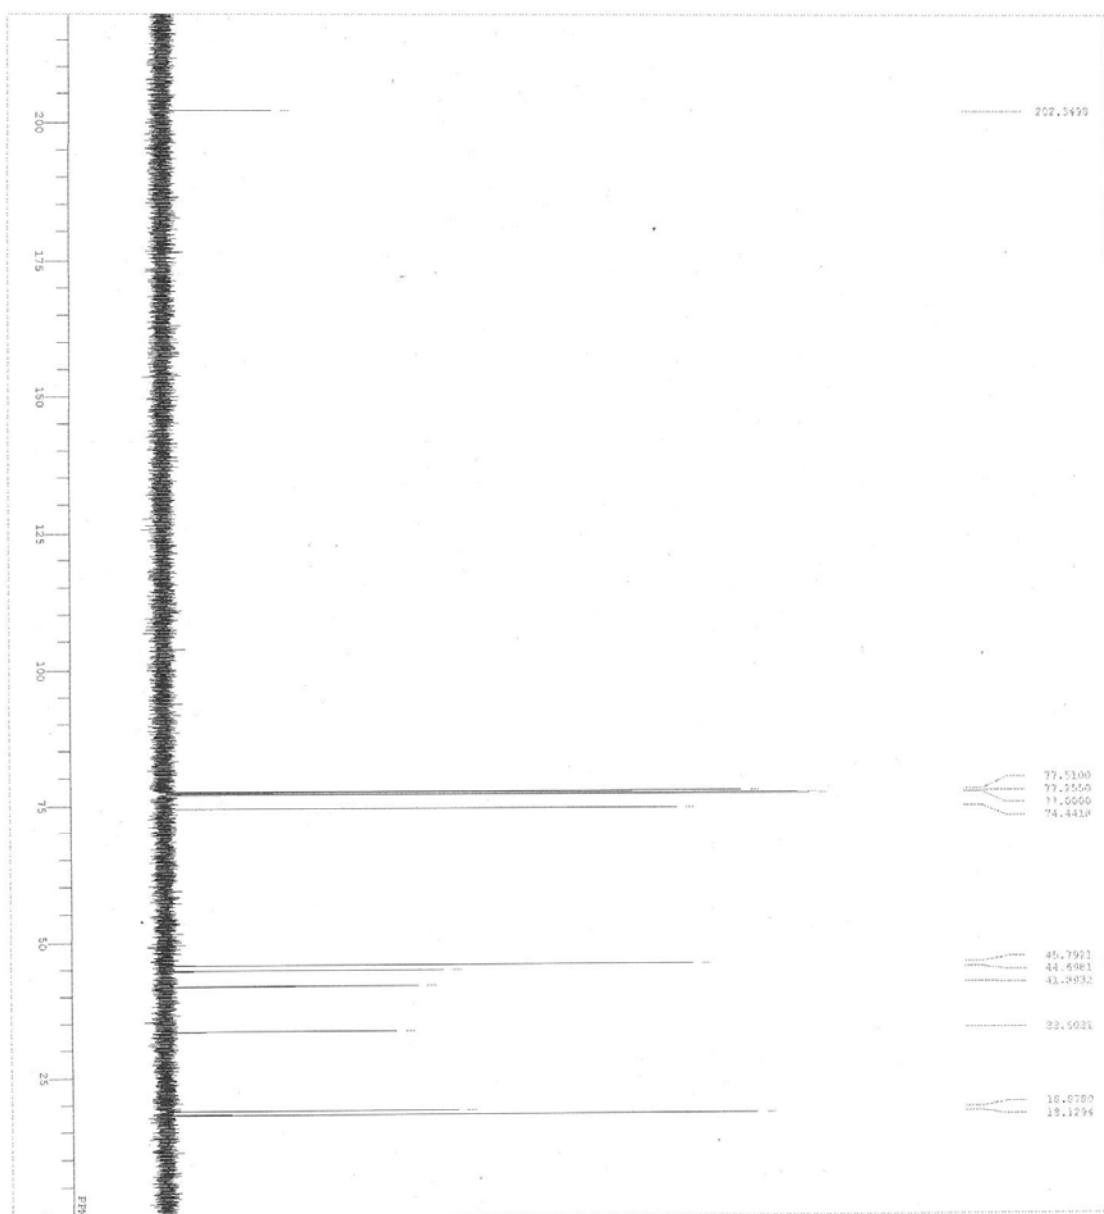

FILE MB-075-C.mrdata  
 NAME MB-075-C  
 DATE 11 NOV 6 11:29:12 2009  
 PROG 13C NMR  
 EXPOD 1.00  
 OBSFQ 125.65 MHz  
 OBSF2 125.00 MHz  
 OBSF3 125.00 MHz  
 POINT 132768 Hz  
 FREQ0 33898.30 Hz  
 SCANS 298  
 ACQTN 0.2651 sec  
 RELAX 2.0000 sec  
 INPRC 5.50 msec  
 CTENP 1.0  
 SLEW 29.0 c  
 SWH 77.00 MHz  
 FWHM 0.12 Hz  
 RGAIN 30

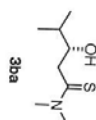

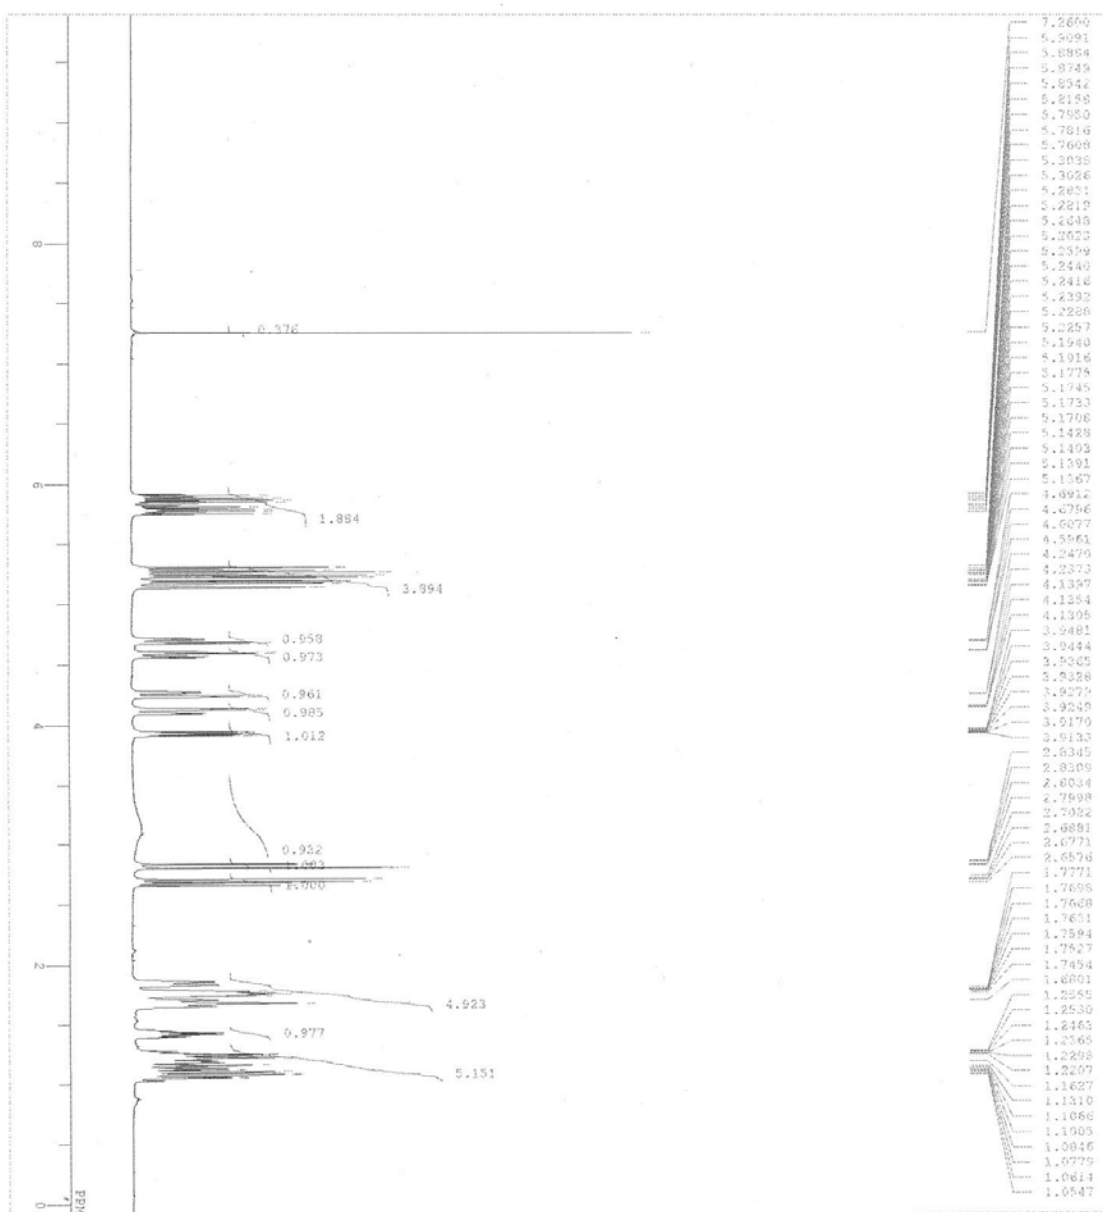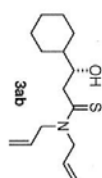

FILE MIB-077-01s  
 COUNT MIB-077-  
 DATE Sat Sep 26 12:06:05 2009  
 DNAME  
 EXNO 1H  
 EXNO non  
 OPRQ 500.00 MHz  
 OPRQ 160.00 MHz  
 OPRQ 2160.00 Hz  
 POINT 32768  
 FREQ 100000.00 Hz  
 SCANS 46  
 ACQTH 3.2746 sec  
 PD 3.1232 sec  
 PUL 6.50 usec  
 PRNUC 1H  
 CTEND 28.3 C  
 SINT CDCL3  
 EXREF 7.26 ppm  
 BP 0.01 Hz  
 RGAIN 18

MIB-077

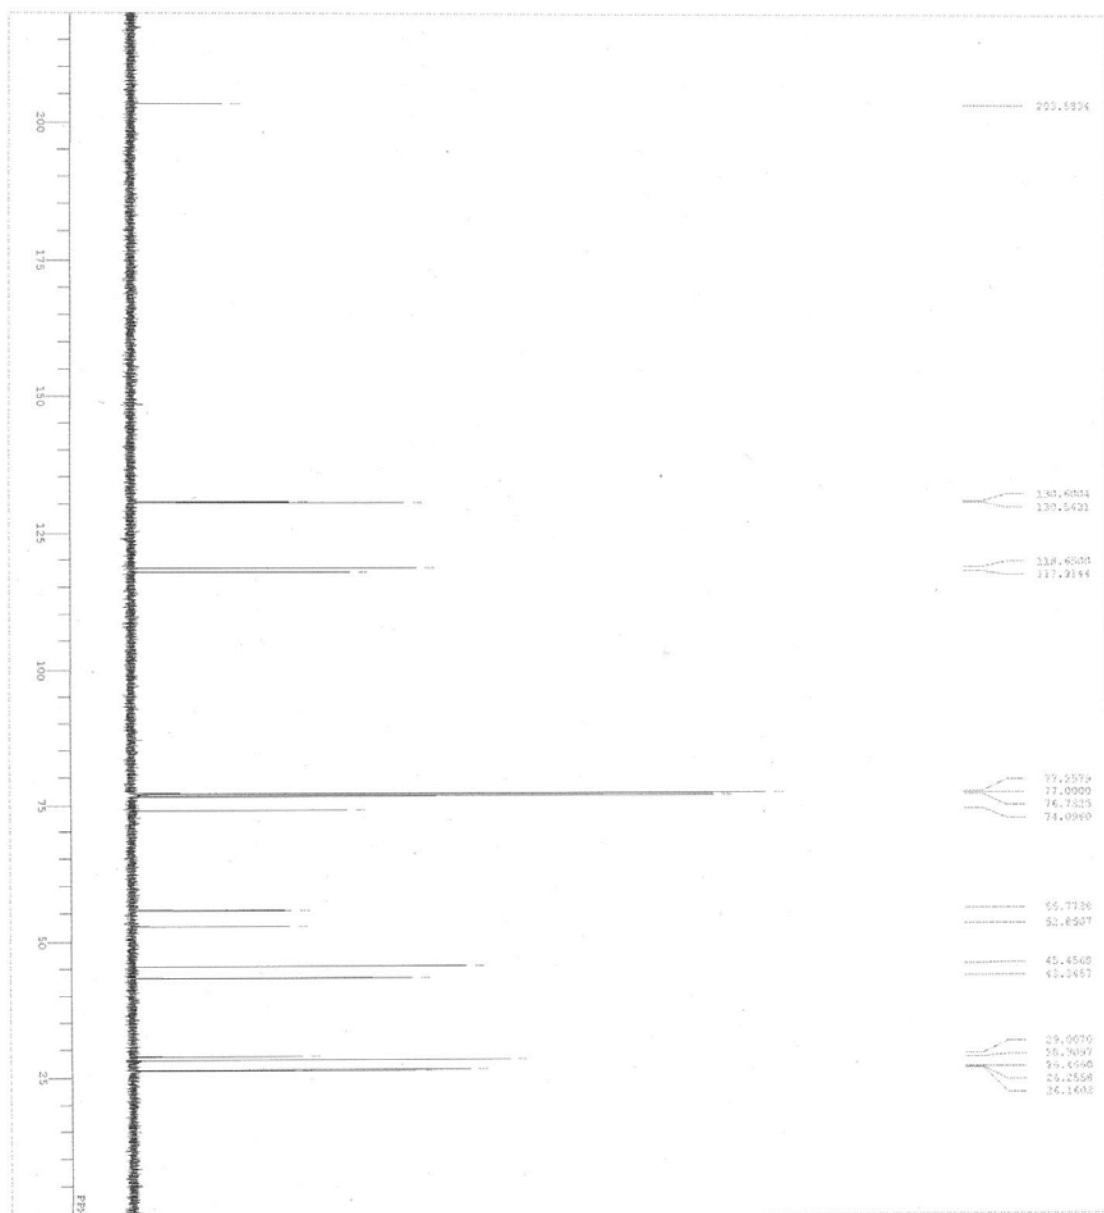

DFILE MIB-077-C-als  
 COMPT MIB-077 15:44:44  
 DATE 16-07-2009 15:44:44  
 INSTR 13C  
 EXMOD single-pulse dac  
 CHRG 123.26 MHz  
 CHRG 2.31 KHz  
 CHRG 2.31 KHz  
 CHRG 2.31 KHz  
 FREQ 30863.73 Hz  
 SCANS 945  
 ACQTM 0.8493 sec  
 PD 2.0000 sec  
 DEL 3.50 msec  
 TRNG 1H  
 CTNS 25.7 c  
 SLVNT CDCl3  
 EXREF 71.00 ppm  
 F2 0.00 Hz  
 REFIN 58

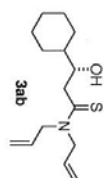

MR-076

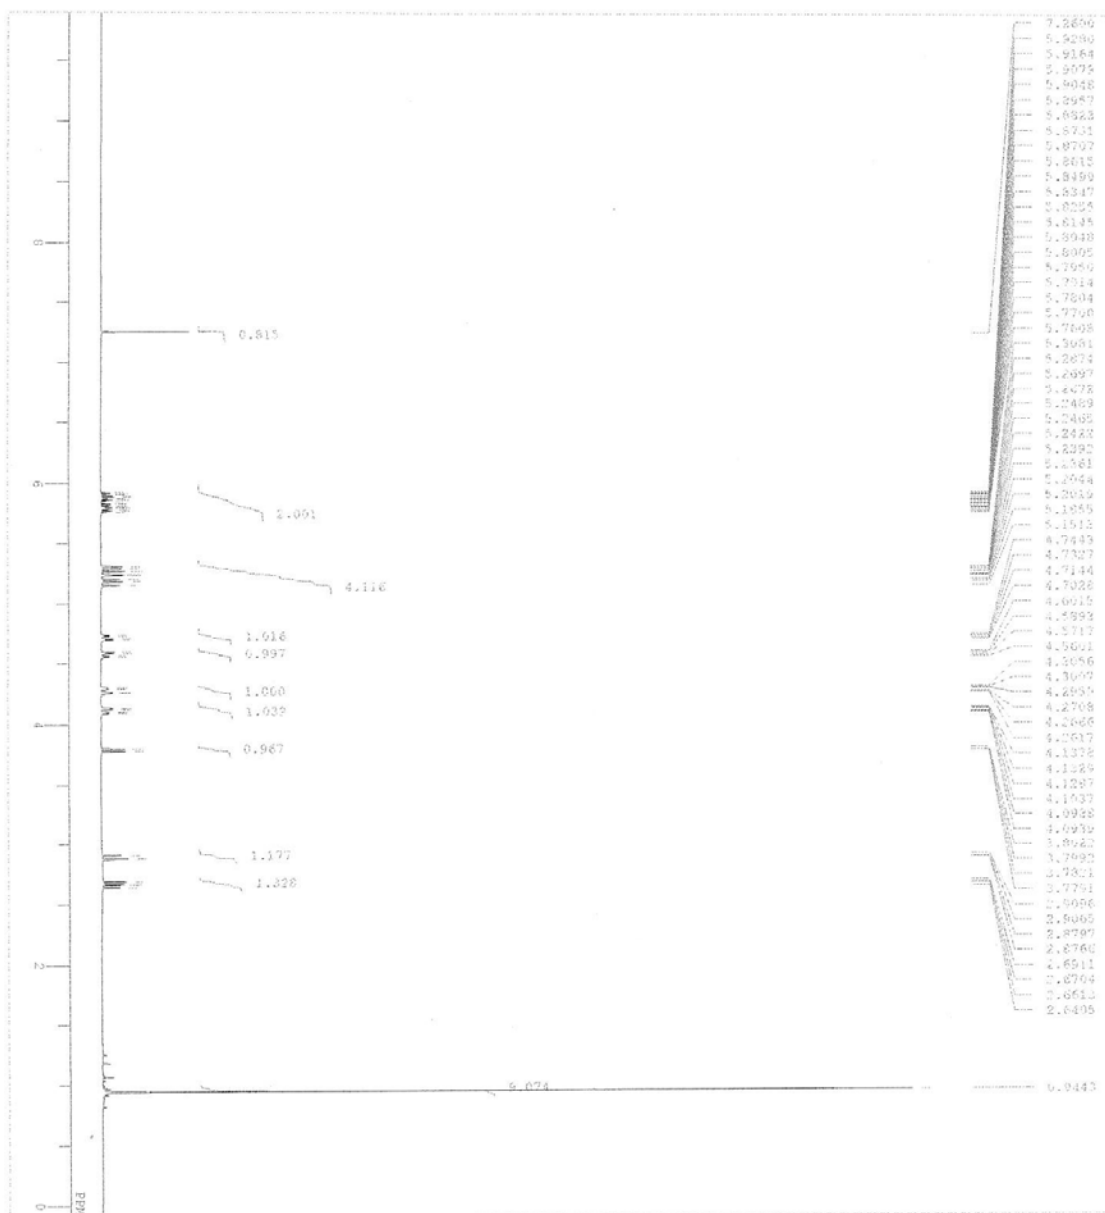

FILE MR-076.mdata  
 COUNT MR-076  
 DATEIN SAT Sep 26 11:51:11 2009  
 ORIGIN 1H  
 EXMOD non  
 OFFSET 500.00 MHz  
 OFFSET 150.00 MHz  
 OFFSET 2150.00 Hz  
 POINT 32768 Hz  
 FREQ 10000.00 Hz  
 SCANS 16  
 ACQTH 3.2168 sec  
 FID 3.7212 sec  
 PUL 6.50 usec  
 INPRC 1H  
 CTXPR 28.4 C  
 SLVIT CXCL3 7.26 ppm  
 EXREF 0.01 Hz  
 BF 21  
 RAIN

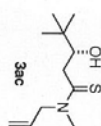

MIB-076

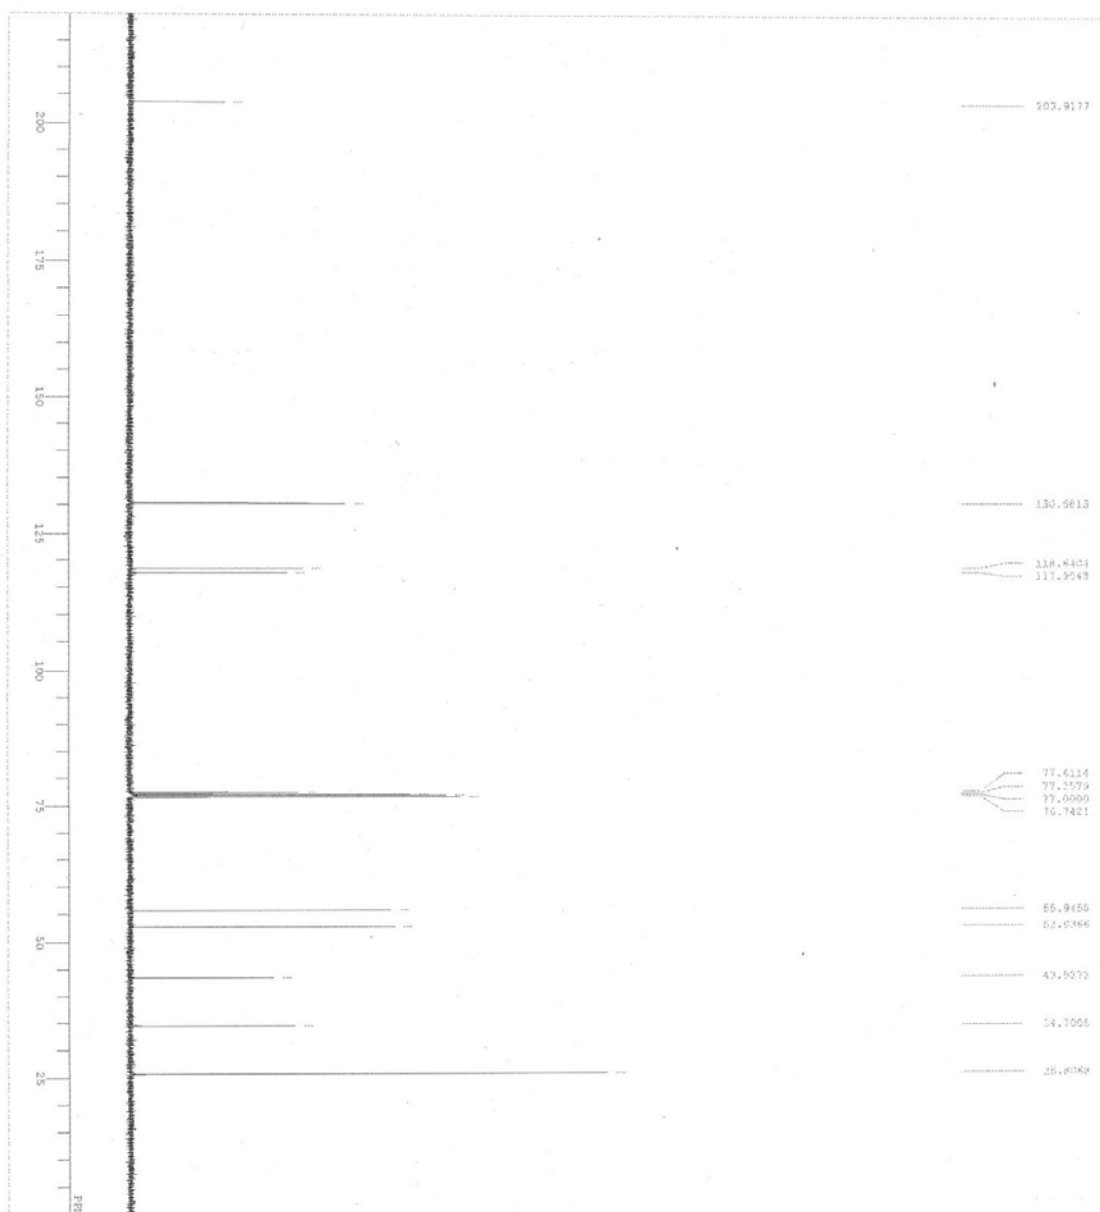

FILE MIB-076-C-als  
 COUNT 16  
 DATE 16-05-2009 14:55:46  
 NAME 3ac  
 EXPTYPE 13C  
 PULPROG zgpg30  
 PROCNO 1  
 F2 125.76 MHz  
 F1 500.13 MHz  
 SCANS 648  
 ACQTM 0.8493 sec  
 PD 2.0000 sec  
 P1 1.00 sec  
 P2 3.20 sec  
 T1 25.8 sec  
 T2 25.8 sec  
 C13 77.00 ppm  
 EXPT 1  
 BF 0.01 Hz  
 SOLVENT CDCl3  
 NS 640

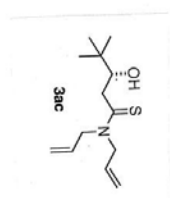



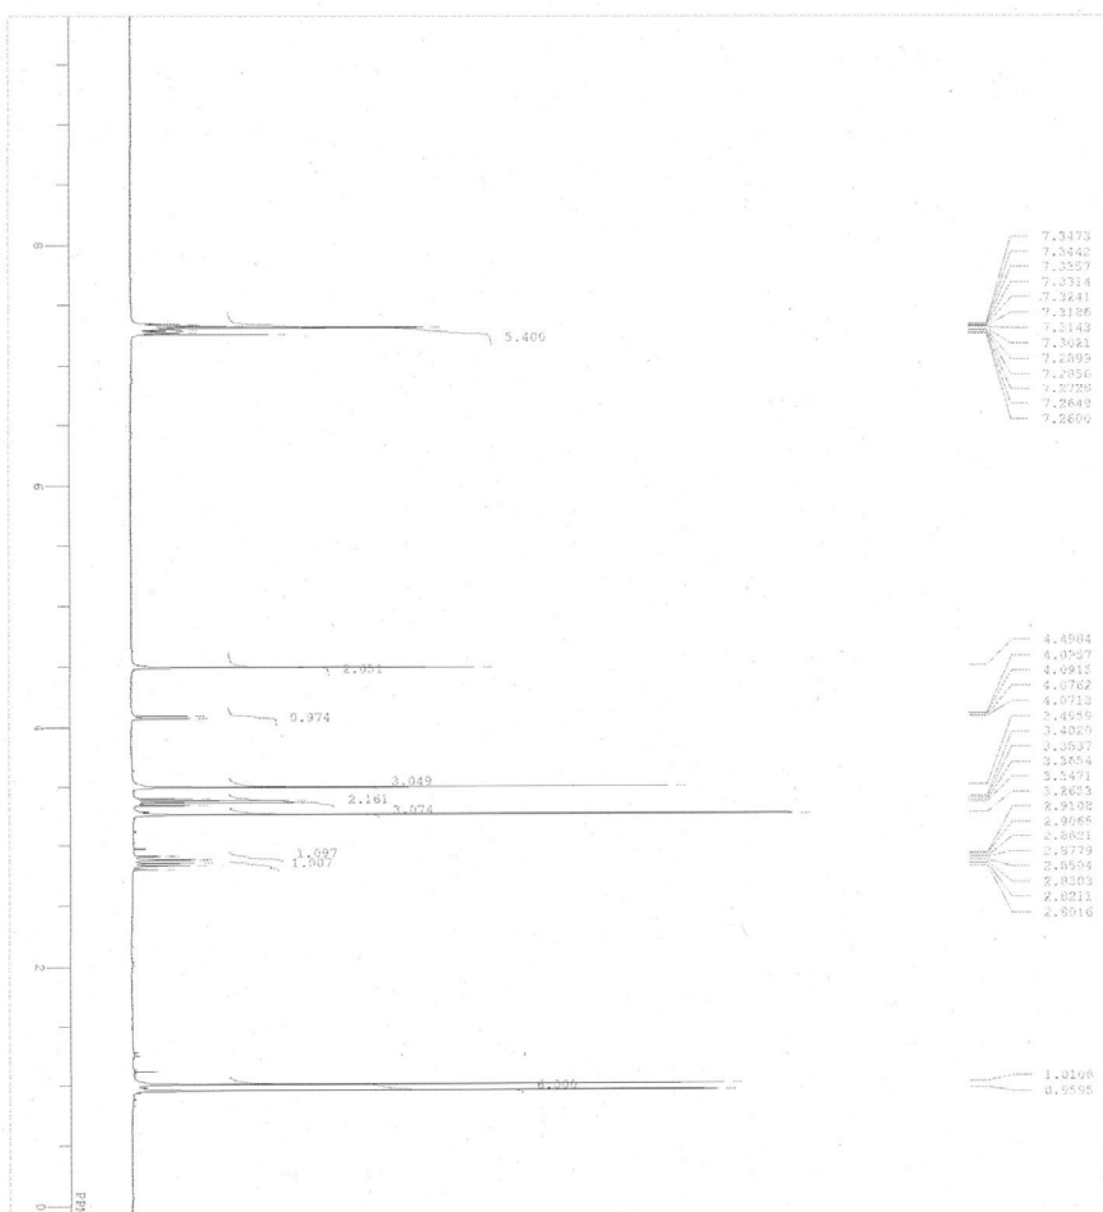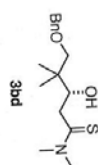

DFILE MB-058.mdata  
 COUNT MB-058  
 DATE Thu Sep 10 23:20:29 2009  
 ORNUC 1H  
 EXMOD non  
 ORFQ 500.00 MHz  
 ORSET 160.00 MHz  
 ORFIN 2160.00 Hz  
 POINT 32768  
 FREQ 100000.00 Hz  
 SCANS 16  
 ACQTM 3.2768 sec  
 PD 3.7232 sec  
 F1 6.50 usec  
 INOC 1H  
 CTMP 30.0 c  
 SLVT CDCl3  
 EXREF 7.26 ppm  
 RF 0.22 Hz  
 REAIN 19

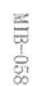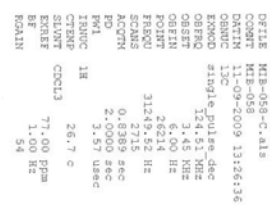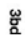

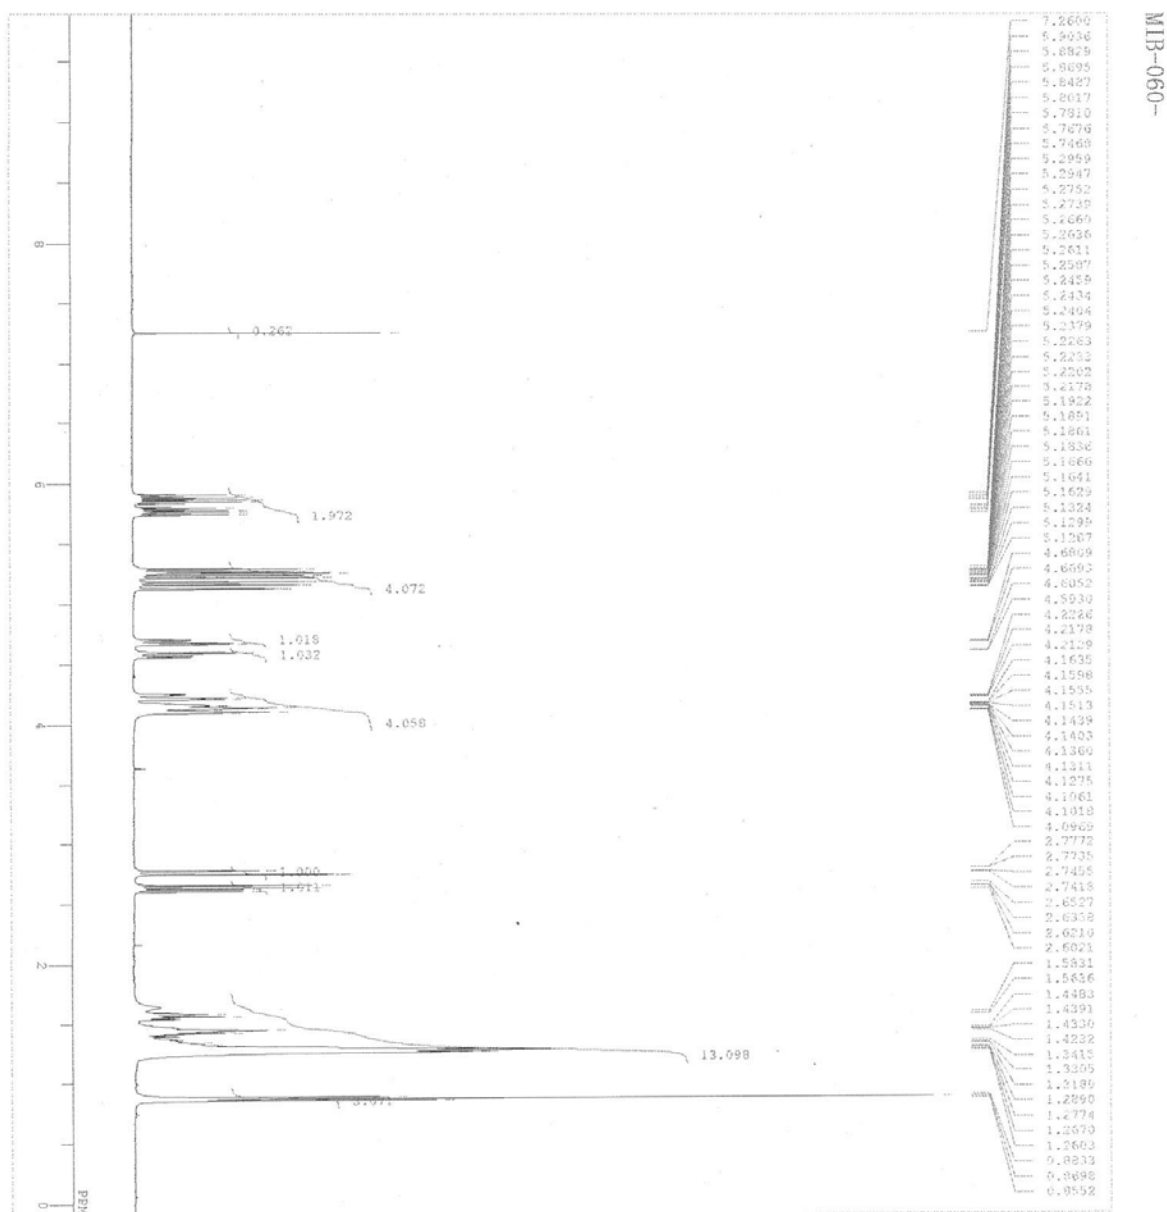

FILE MIB-060-.indata  
 COUNT MIB-060-  
 DATE Mon Sep 14 11:28:04 2009  
 NAME 1H  
 EXMOD non  
 ORFREQ 500.00 MHz  
 ORSET 150.00 MHz  
 ORF1 2150.00 Hz  
 POINT 32768  
 FREQ 10000.00 Hz  
 SCANS 16  
 ACQTM 3.216 sec  
 PD 3.123 sec  
 P1 6.50 usec  
 PRG 1H  
 INUC 26.5 C  
 CDCL3 7.26 ppm  
 STUNT 1.20 Hz  
 EXREF 17  
 RGAIN 17

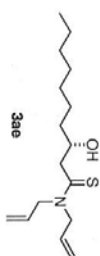

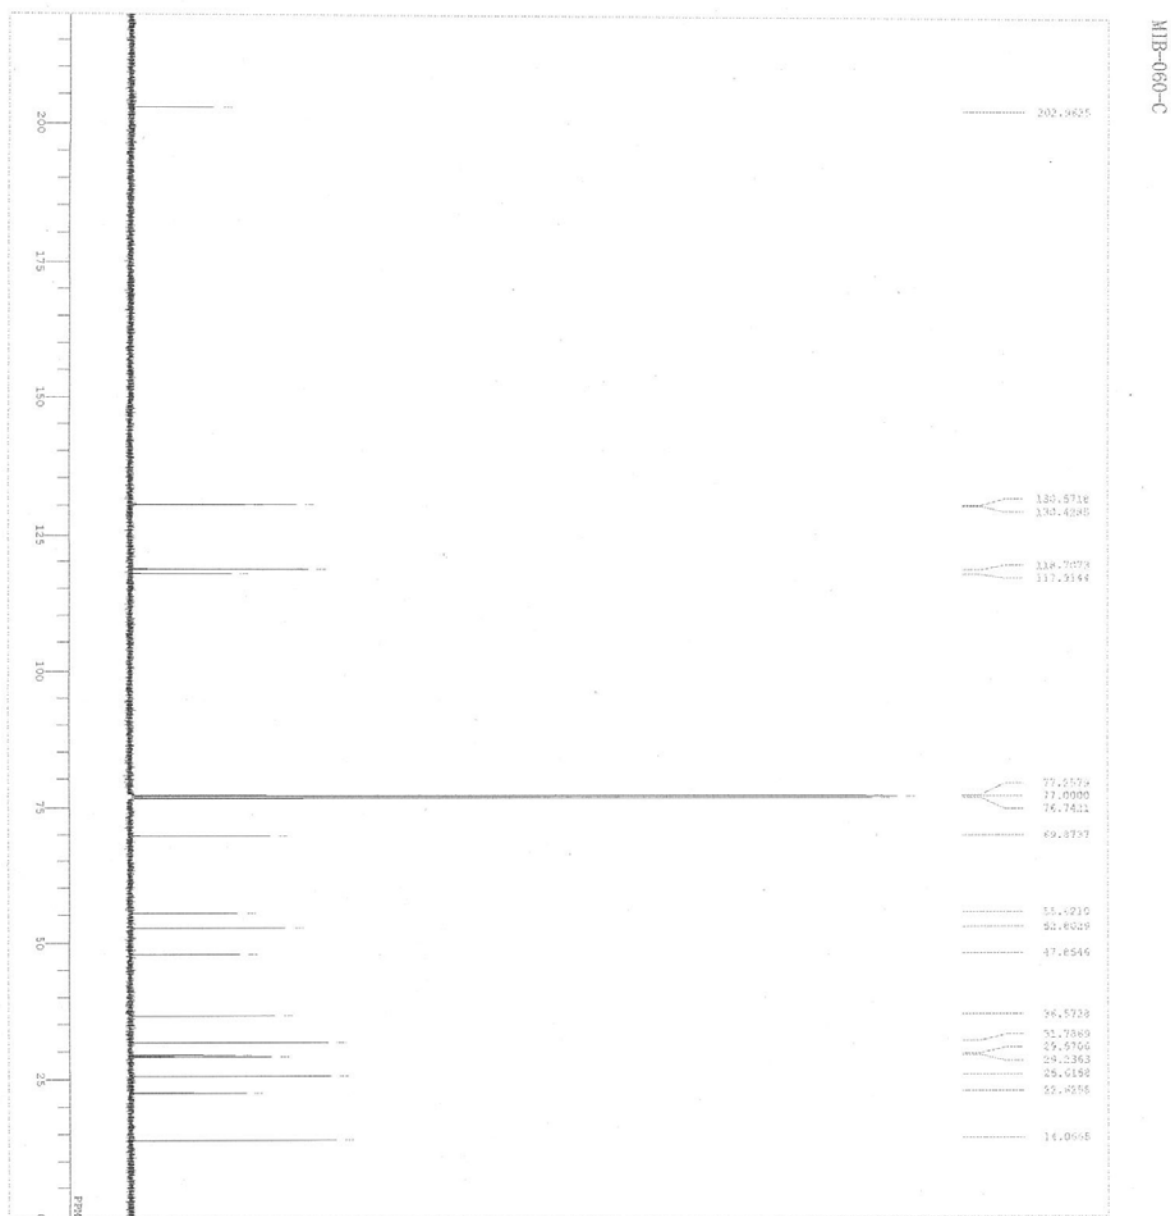

DFILE MIR-060-C.siz  
 CONTC MIR-060-C  
 NAME 13C-09-2009 12:48:37  
 INSTR 13C  
 EXMO single-pulse-dec  
 ORFQ 133.26 MHz  
 ORSET 2.31 MHz  
 PULPR 2.6214 Hz  
 FREQU 30869.73 Hz  
 SCANS 1504  
 ACQTM 0.8493 sec  
 PD 2.0020 sec  
 F2 5.20 sec  
 INMR 1H 23.4 G  
 CTMR CDCl3  
 SLMR 77.00 PPM  
 EXMR 0.41 Hz  
 RGAIN 60

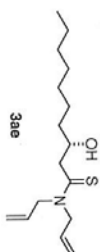

MIB-085

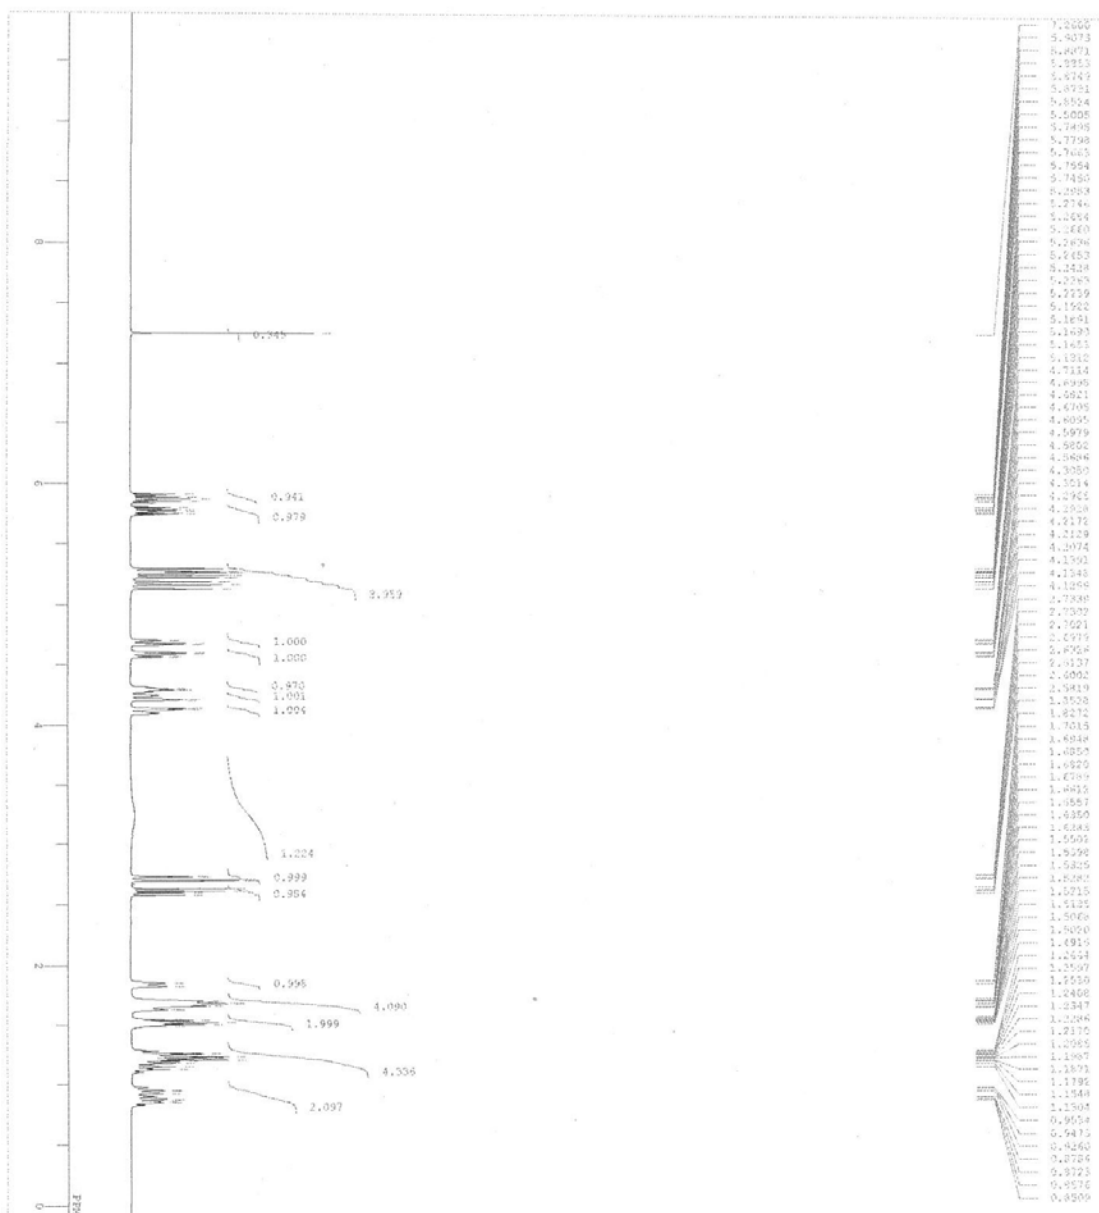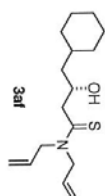

DRYFILE MIB-085.n18  
CONVERT MIB-085 1.23154109 2009  
NAME MIB-085  
EXPNO 1  
PROCNO 1  
F2 1  
F3 1  
F4 1  
F5 1  
F6 1  
F7 1  
F8 1  
F9 1  
F10 1  
F11 1  
F12 1  
F13 1  
F14 1  
F15 1  
F16 1  
F17 1  
F18 1  
F19 1  
F20 1  
F21 1  
F22 1  
F23 1  
F24 1  
F25 1  
F26 1  
F27 1  
F28 1  
F29 1  
F30 1  
F31 1  
F32 1  
F33 1  
F34 1  
F35 1  
F36 1  
F37 1  
F38 1  
F39 1  
F40 1  
F41 1  
F42 1  
F43 1  
F44 1  
F45 1  
F46 1  
F47 1  
F48 1  
F49 1  
F50 1  
F51 1  
F52 1  
F53 1  
F54 1  
F55 1  
F56 1  
F57 1  
F58 1  
F59 1  
F60 1  
F61 1  
F62 1  
F63 1  
F64 1  
F65 1  
F66 1  
F67 1  
F68 1  
F69 1  
F70 1  
F71 1  
F72 1  
F73 1  
F74 1  
F75 1  
F76 1  
F77 1  
F78 1  
F79 1  
F80 1  
F81 1  
F82 1  
F83 1  
F84 1  
F85 1  
F86 1  
F87 1  
F88 1  
F89 1  
F90 1  
F91 1  
F92 1  
F93 1  
F94 1  
F95 1  
F96 1  
F97 1  
F98 1  
F99 1  
F100 1  
F101 1  
F102 1  
F103 1  
F104 1  
F105 1  
F106 1  
F107 1  
F108 1  
F109 1  
F110 1  
F111 1  
F112 1  
F113 1  
F114 1  
F115 1  
F116 1  
F117 1  
F118 1  
F119 1  
F120 1  
F121 1  
F122 1  
F123 1  
F124 1  
F125 1  
F126 1  
F127 1  
F128 1  
F129 1  
F130 1  
F131 1  
F132 1  
F133 1  
F134 1  
F135 1  
F136 1  
F137 1  
F138 1  
F139 1  
F140 1  
F141 1  
F142 1  
F143 1  
F144 1  
F145 1  
F146 1  
F147 1  
F148 1  
F149 1  
F150 1  
F151 1  
F152 1  
F153 1  
F154 1  
F155 1  
F156 1  
F157 1  
F158 1  
F159 1  
F160 1  
F161 1  
F162 1  
F163 1  
F164 1  
F165 1  
F166 1  
F167 1  
F168 1  
F169 1  
F170 1  
F171 1  
F172 1  
F173 1  
F174 1  
F175 1  
F176 1  
F177 1  
F178 1  
F179 1  
F180 1  
F181 1  
F182 1  
F183 1  
F184 1  
F185 1  
F186 1  
F187 1  
F188 1  
F189 1  
F190 1  
F191 1  
F192 1  
F193 1  
F194 1  
F195 1  
F196 1  
F197 1  
F198 1  
F199 1  
F200 1  
F201 1  
F202 1  
F203 1  
F204 1  
F205 1  
F206 1  
F207 1  
F208 1  
F209 1  
F210 1  
F211 1  
F212 1  
F213 1  
F214 1  
F215 1  
F216 1  
F217 1  
F218 1  
F219 1  
F220 1  
F221 1  
F222 1  
F223 1  
F224 1  
F225 1  
F226 1  
F227 1  
F228 1  
F229 1  
F230 1  
F231 1  
F232 1  
F233 1  
F234 1  
F235 1  
F236 1  
F237 1  
F238 1  
F239 1  
F240 1  
F241 1  
F242 1  
F243 1  
F244 1  
F245 1  
F246 1  
F247 1  
F248 1  
F249 1  
F250 1  
F251 1  
F252 1  
F253 1  
F254 1  
F255 1  
F256 1  
F257 1  
F258 1  
F259 1  
F260 1  
F261 1  
F262 1  
F263 1  
F264 1  
F265 1  
F266 1  
F267 1  
F268 1  
F269 1  
F270 1  
F271 1  
F272 1  
F273 1  
F274 1  
F275 1  
F276 1  
F277 1  
F278 1  
F279 1  
F280 1  
F281 1  
F282 1  
F283 1  
F284 1  
F285 1  
F286 1  
F287 1  
F288 1  
F289 1  
F290 1  
F291 1  
F292 1  
F293 1  
F294 1  
F295 1  
F296 1  
F297 1  
F298 1  
F299 1  
F300 1  
F301 1  
F302 1  
F303 1  
F304 1  
F305 1  
F306 1  
F307 1  
F308 1  
F309 1  
F310 1  
F311 1  
F312 1  
F313 1  
F314 1  
F315 1  
F316 1  
F317 1  
F318 1  
F319 1  
F320 1  
F321 1  
F322 1  
F323 1  
F324 1  
F325 1  
F326 1  
F327 1  
F328 1  
F329 1  
F330 1  
F331 1  
F332 1  
F333 1  
F334 1  
F335 1  
F336 1  
F337 1  
F338 1  
F339 1  
F340 1  
F341 1  
F342 1  
F343 1  
F344 1  
F345 1  
F346 1  
F347 1  
F348 1  
F349 1  
F350 1  
F351 1  
F352 1  
F353 1  
F354 1  
F355 1  
F356 1  
F357 1  
F358 1  
F359 1  
F360 1  
F361 1  
F362 1  
F363 1  
F364 1  
F365 1  
F366 1  
F367 1  
F368 1  
F369 1  
F370 1  
F371 1  
F372 1  
F373 1  
F374 1  
F375 1  
F376 1  
F377 1  
F378 1  
F379 1  
F380 1  
F381 1  
F382 1  
F383 1  
F384 1  
F385 1  
F386 1  
F387 1  
F388 1  
F389 1  
F390 1  
F391 1  
F392 1  
F393 1  
F394 1  
F395 1  
F396 1  
F397 1  
F398 1  
F399 1  
F400 1  
F401 1  
F402 1  
F403 1  
F404 1  
F405 1  
F406 1  
F407 1  
F408 1  
F409 1  
F410 1  
F411 1  
F412 1  
F413 1  
F414 1  
F415 1  
F416 1  
F417 1  
F418 1  
F419 1  
F420 1  
F421 1  
F422 1  
F423 1  
F424 1  
F425 1  
F426 1  
F427 1  
F428 1  
F429 1  
F430 1  
F431 1  
F432 1  
F433 1  
F434 1  
F435 1  
F436 1  
F437 1  
F438 1  
F439 1  
F440 1  
F441 1  
F442 1  
F443 1  
F444 1  
F445 1  
F446 1  
F447 1  
F448 1  
F449 1  
F450 1  
F451 1  
F452 1  
F453 1  
F454 1  
F455 1  
F456 1  
F457 1  
F458 1  
F459 1  
F460 1  
F461 1  
F462 1  
F463 1  
F464 1  
F465 1  
F466 1  
F467 1  
F468 1  
F469 1  
F470 1  
F471 1  
F472 1  
F473 1  
F474 1  
F475 1  
F476 1  
F4

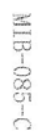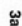

|        |                         |     |
|--------|-------------------------|-----|
| DETE   | MIR-085-C.inducta       |     |
| CONAT  | MIR-085-C               |     |
| DATUM  | Fri Oct 2 00:25:12 2009 |     |
| EBNMC  | 13C                     | bcm |
| EXMOD  |                         |     |
| OBFRQ  | 125.65 MHz              |     |
| OBSET  | 120.00 MHz              |     |
| OBFIN  | 7958.00 Hz              |     |
| POINT  | 32768                   |     |
| FREQD  | 33698.30 Hz             |     |
| SCANS  | 209                     |     |
| ACQTIM | 0.9667 sec              |     |
| PD     | 2.0033 sec              |     |
| PHI    | 3.50 usec               |     |
| TRPC   | 1H                      |     |
| TRPDC  | 30.5 c                  |     |
| STWNT  | CDCL3                   |     |
| EXPFR  | 77.00 ppm               |     |
| RF     | 0.01 Hz                 |     |
| RGAIN  | 31                      |     |

MIB-084-

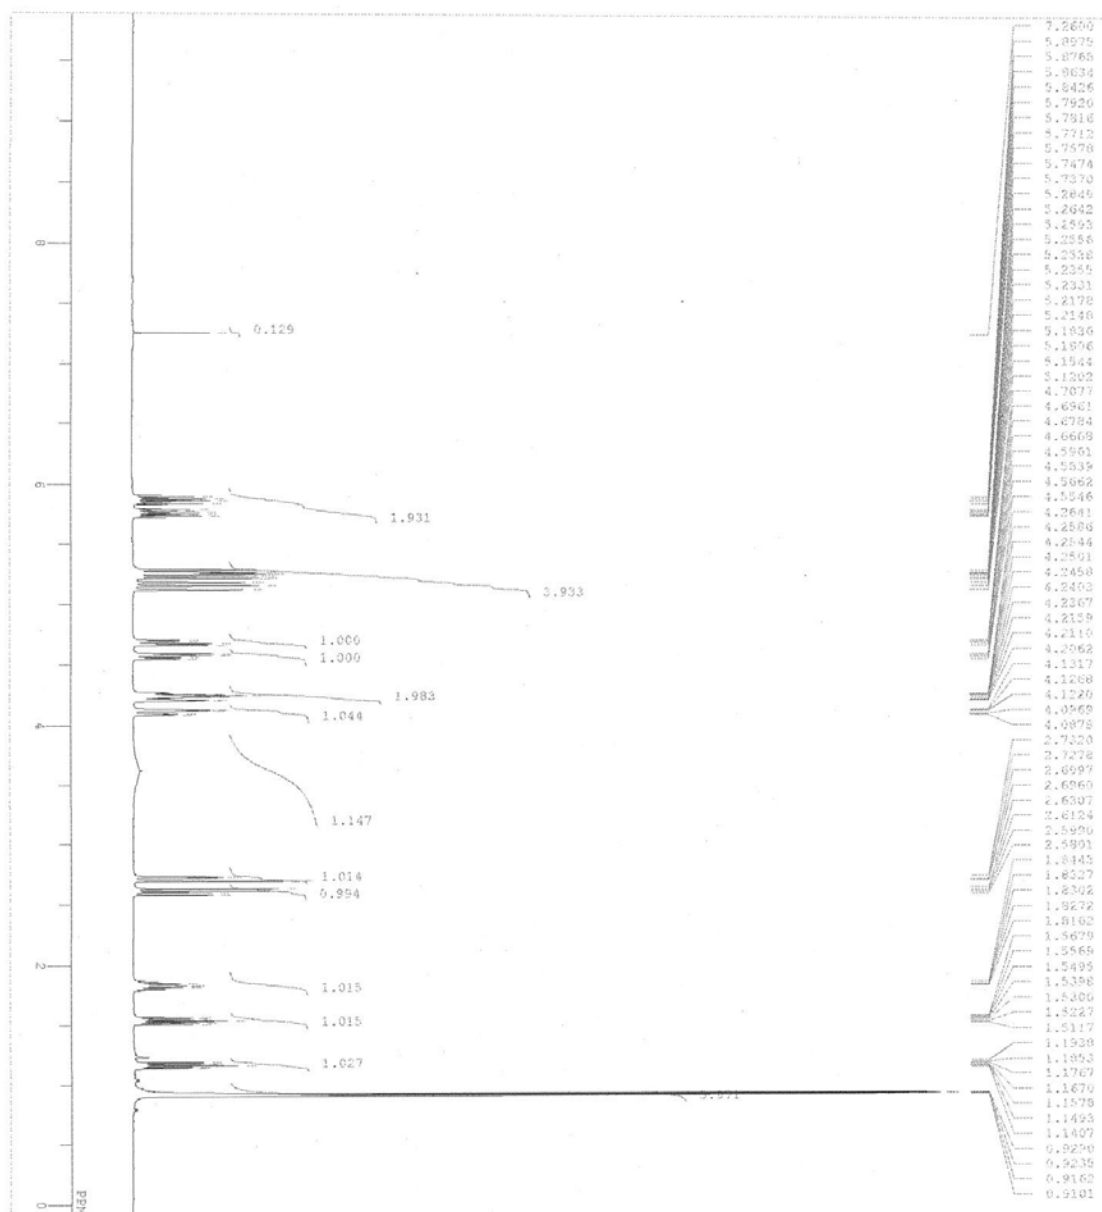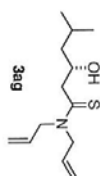

```

DETE MIB-084-.indata
CONT MIB-084-
DATE Thu Oct 1 23:46:37 2009
PROB 1H
PULPROG zgpg30
TD 65536
SOLVENT CDCl3
NS 2048
DS 4
AQ 6.50 usec
RG 1.00
FIDRES 0.01 Hz
AQUE 0.01 Hz
RGAIN 15
  
```

MB-084-C

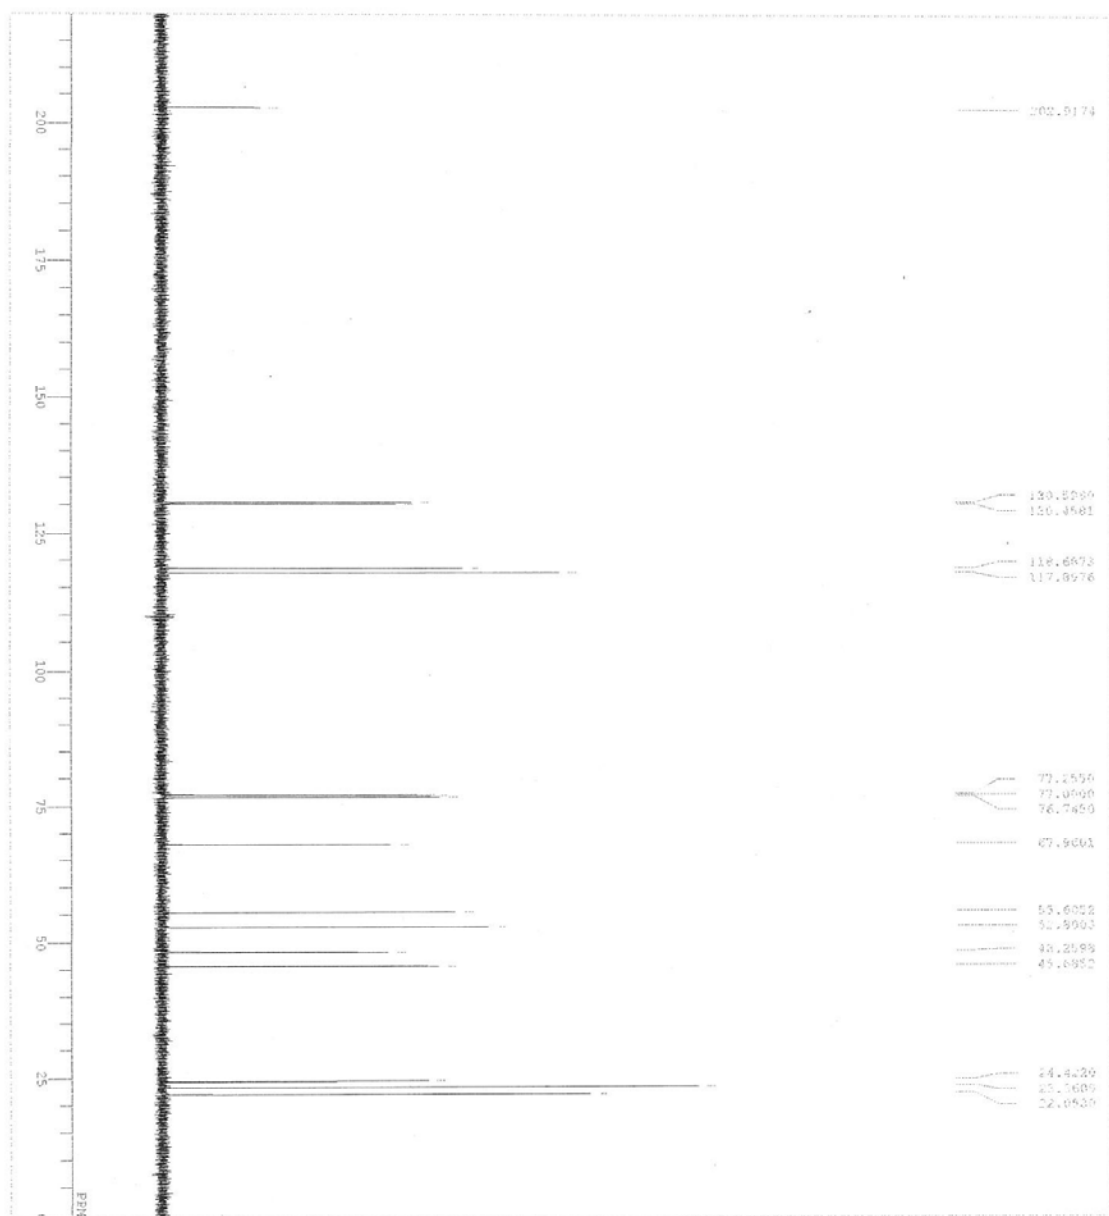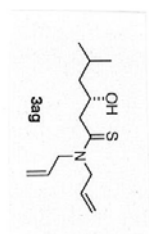

FILE MB-084-C.mdata  
 COUNT MB-084-C  
 DATE Fri Oct 2 00:10:43 2009  
 INSTR 1D  
 EXPO 100  
 F2 135.65 MHz  
 C13 120.00 MHz  
 OBS1 756.00 Hz  
 POINT 32768  
 FREQ 33898.30 Hz  
 SCANS 146  
 ACQTM 0.9667 sec  
 PD 2.0333 sec  
 PUL 5.50 usec  
 INOC 1H  
 CTDPH 30.3 c  
 STVMT C13  
 STVMT 77.00 ppm  
 EXREF 0.01 Hz  
 RF 31  
 RGAIN



MIP-087

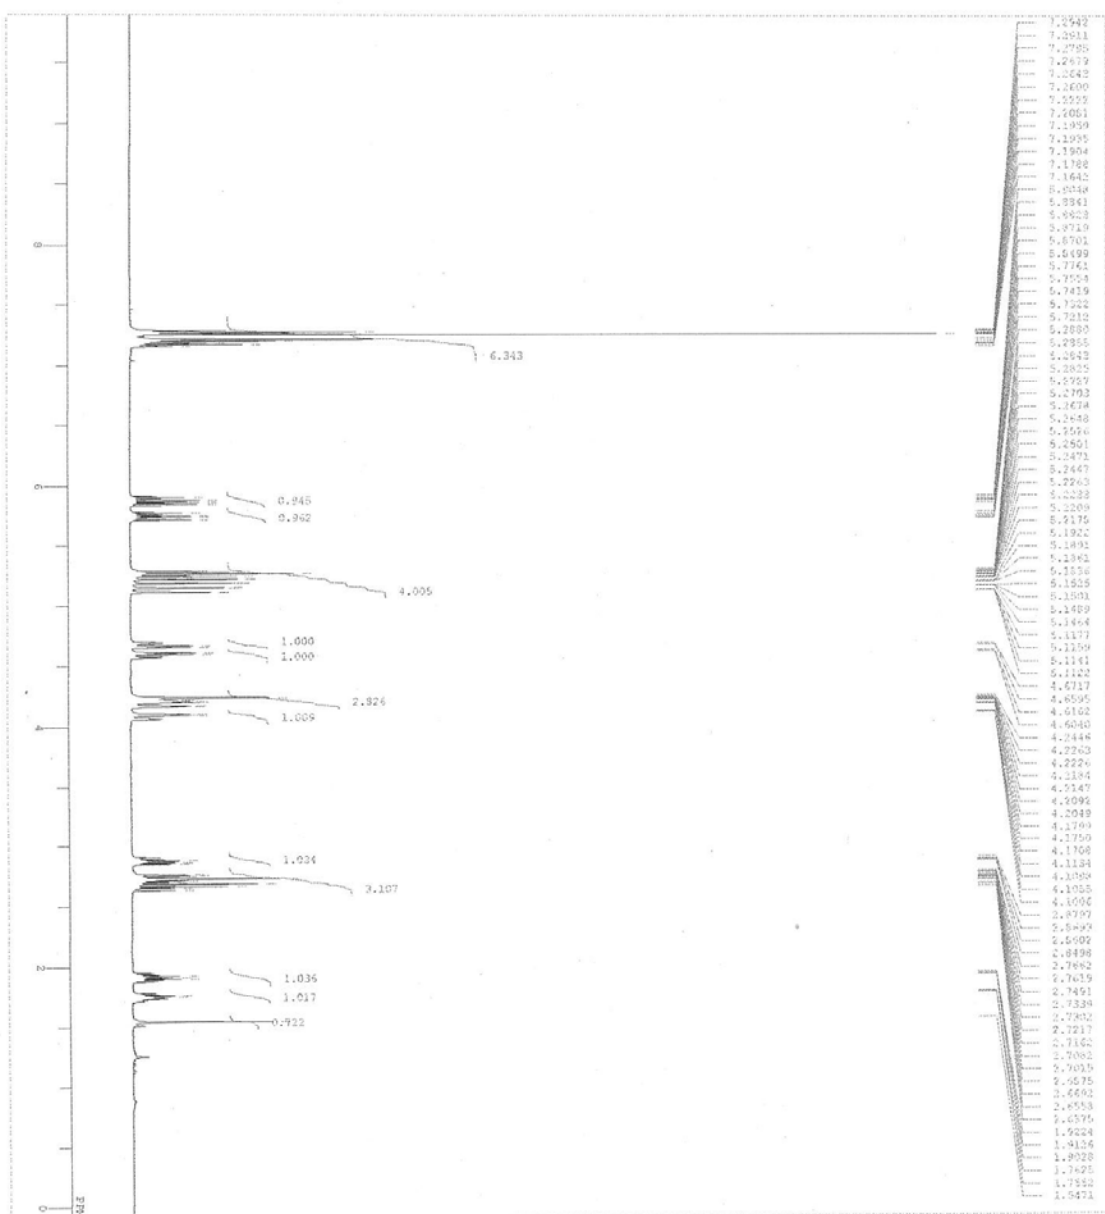

FILE: MIP-087.mrdata  
 DATE: 2009-04-12 12:37:13  
 NAME: MIP-087  
 INSTR: 500 MHz  
 P1: 1.00  
 FREQ: 500.136  
 POINT: 1  
 SCANS: 10000.00  
 ACQTIME: 16.00  
 F2: 3.2235 sec  
 FWHM: 6.50 usec  
 INOC: 1H  
 CTMP: 28.3 C  
 SLVNT: CDCl3  
 REF: 1.26 ppm  
 RF: 0.12 Hz  
 RGAIN: 22

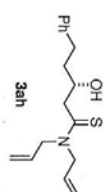

MIB-062-C

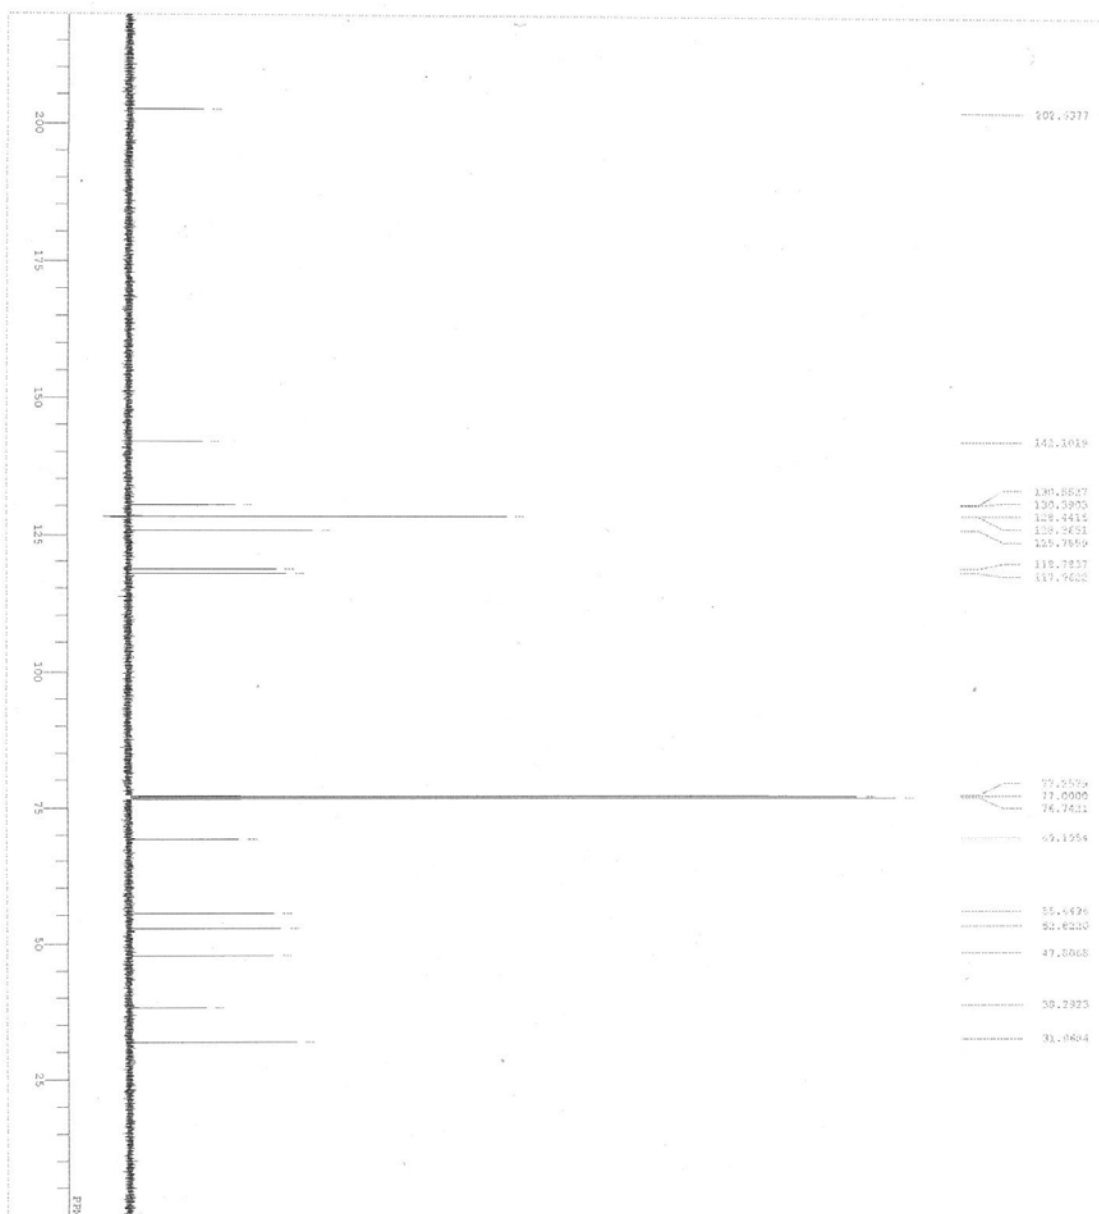

FILE MIB-062-C.als  
COMET MIB-062-C  
DATE 13-09-2009 18:27:18  
NAME 3ah  
EXPNO 1  
PROCNO 1  
PROCPS 1  
SCANS 1168  
ACQTIME 0.8493 sec  
F2 2.0000 sec  
F2H 3.20 sec  
IRBNC 1R  
CTHRS 25.1 C  
SOLVENT CDCl3  
P1 77.00 ppm  
P2 77.00 Hz  
RGAIN 60

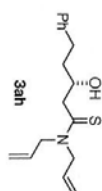

MIB-099

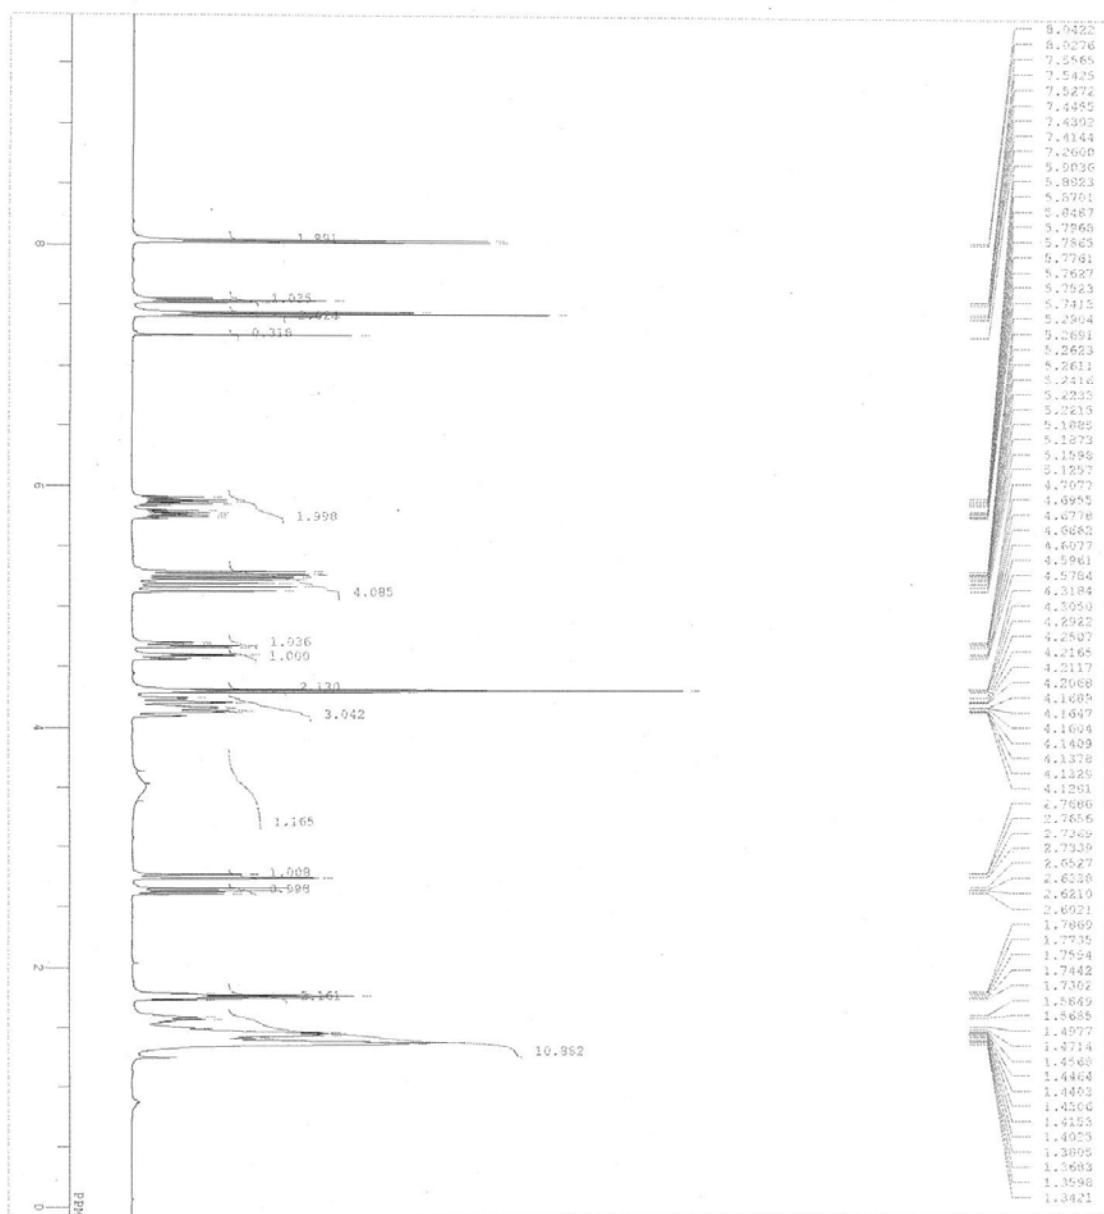

1H NMR (CDCl<sub>3</sub>)  
 10.982, 7.362, 7.356, 7.350, 7.344, 7.338, 7.332, 7.326, 7.320, 7.314, 7.308, 7.302, 7.296, 7.290, 7.284, 7.278, 7.272, 7.266, 7.260, 7.254, 7.248, 7.242, 7.236, 7.230, 7.224, 7.218, 7.212, 7.206, 7.200, 7.194, 7.188, 7.182, 7.176, 7.170, 7.164, 7.158, 7.152, 7.146, 7.140, 7.134, 7.128, 7.122, 7.116, 7.110, 7.104, 7.098, 7.092, 7.086, 7.080, 7.074, 7.068, 7.062, 7.056, 7.050, 7.044, 7.038, 7.032, 7.026, 7.020, 7.014, 7.008, 7.002, 6.996, 6.990, 6.984, 6.978, 6.972, 6.966, 6.960, 6.954, 6.948, 6.942, 6.936, 6.930, 6.924, 6.918, 6.912, 6.906, 6.900, 6.894, 6.888, 6.882, 6.876, 6.870, 6.864, 6.858, 6.852, 6.846, 6.840, 6.834, 6.828, 6.822, 6.816, 6.810, 6.804, 6.798, 6.792, 6.786, 6.780, 6.774, 6.768, 6.762, 6.756, 6.750, 6.744, 6.738, 6.732, 6.726, 6.720, 6.714, 6.708, 6.702, 6.696, 6.690, 6.684, 6.678, 6.672, 6.666, 6.660, 6.654, 6.648, 6.642, 6.636, 6.630, 6.624, 6.618, 6.612, 6.606, 6.600, 6.594, 6.588, 6.582, 6.576, 6.570, 6.564, 6.558, 6.552, 6.546, 6.540, 6.534, 6.528, 6.522, 6.516, 6.510, 6.504, 6.498, 6.492, 6.486, 6.480, 6.474, 6.468, 6.462, 6.456, 6.450, 6.444, 6.438, 6.432, 6.426, 6.420, 6.414, 6.408, 6.402, 6.396, 6.390, 6.384, 6.378, 6.372, 6.366, 6.360, 6.354, 6.348, 6.342, 6.336, 6.330, 6.324, 6.318, 6.312, 6.306, 6.300, 6.294, 6.288, 6.282, 6.276, 6.270, 6.264, 6.258, 6.252, 6.246, 6.240, 6.234, 6.228, 6.222, 6.216, 6.210, 6.204, 6.198, 6.192, 6.186, 6.180, 6.174, 6.168, 6.162, 6.156, 6.150, 6.144, 6.138, 6.132, 6.126, 6.120, 6.114, 6.108, 6.102, 6.096, 6.090, 6.084, 6.078, 6.072, 6.066, 6.060, 6.054, 6.048, 6.042, 6.036, 6.030, 6.024, 6.018, 6.012, 6.006, 6.000, 5.994, 5.988, 5.982, 5.976, 5.970, 5.964, 5.958, 5.952, 5.946, 5.940, 5.934, 5.928, 5.922, 5.916, 5.910, 5.904, 5.898, 5.892, 5.886, 5.880, 5.874, 5.868, 5.862, 5.856, 5.850, 5.844, 5.838, 5.832, 5.826, 5.820, 5.814, 5.808, 5.802, 5.796, 5.790, 5.784, 5.778, 5.772, 5.766, 5.760, 5.754, 5.748, 5.742, 5.736, 5.730, 5.724, 5.718, 5.712, 5.706, 5.700, 5.694, 5.688, 5.682, 5.676, 5.670, 5.664, 5.658, 5.652, 5.646, 5.640, 5.634, 5.628, 5.622, 5.616, 5.610, 5.604, 5.598, 5.592, 5.586, 5.580, 5.574, 5.568, 5.562, 5.556, 5.550, 5.544, 5.538, 5.532, 5.526, 5.520, 5.514, 5.508, 5.502, 5.496, 5.490, 5.484, 5.478, 5.472, 5.466, 5.460, 5.454, 5.448, 5.442, 5.436, 5.430, 5.424, 5.418, 5.412, 5.406, 5.400, 5.394, 5.388, 5.382, 5.376, 5.370, 5.364, 5.358, 5.352, 5.346, 5.340, 5.334, 5.328, 5.322, 5.316, 5.310, 5.304, 5.298, 5.292, 5.286, 5.280, 5.274, 5.268, 5.262, 5.256, 5.250, 5.244, 5.238, 5.232, 5.226, 5.220, 5.214, 5.208, 5.202, 5.196, 5.190, 5.184, 5.178, 5.172, 5.166, 5.160, 5.154, 5.148, 5.142, 5.136, 5.130, 5.124, 5.118, 5.112, 5.106, 5.100, 5.094, 5.088, 5.082, 5.076, 5.070, 5.064, 5.058, 5.052, 5.046, 5.040, 5.034, 5.028, 5.022, 5.016, 5.010, 5.004, 4.998, 4.992, 4.986, 4.980, 4.974, 4.968, 4.962, 4.956, 4.950, 4.944, 4.938, 4.932, 4.926, 4.920, 4.914, 4.908, 4.902, 4.896, 4.890, 4.884, 4.878, 4.872, 4.866, 4.860, 4.854, 4.848, 4.842, 4.836, 4.830, 4.824, 4.818, 4.812, 4.806, 4.800, 4.794, 4.788, 4.782, 4.776, 4.770, 4.764, 4.758, 4.752, 4.746, 4.740, 4.734, 4.728, 4.722, 4.716, 4.710, 4.704, 4.698, 4.692, 4.686, 4.680, 4.674, 4.668, 4.662, 4.656, 4.650, 4.644, 4.638, 4.632, 4.626, 4.620, 4.614, 4.608, 4.602, 4.596, 4.590, 4.584, 4.578, 4.572, 4.566, 4.560, 4.554, 4.548, 4.542, 4.536, 4.530, 4.524, 4.518, 4.512, 4.506, 4.500, 4.494, 4.488, 4.482, 4.476, 4.470, 4.464, 4.458, 4.452, 4.446, 4.440, 4.434, 4.428, 4.422, 4.416, 4.410, 4.404, 4.398, 4.392, 4.386, 4.380, 4.374, 4.368, 4.362, 4.356, 4.350,

MIB-099-C

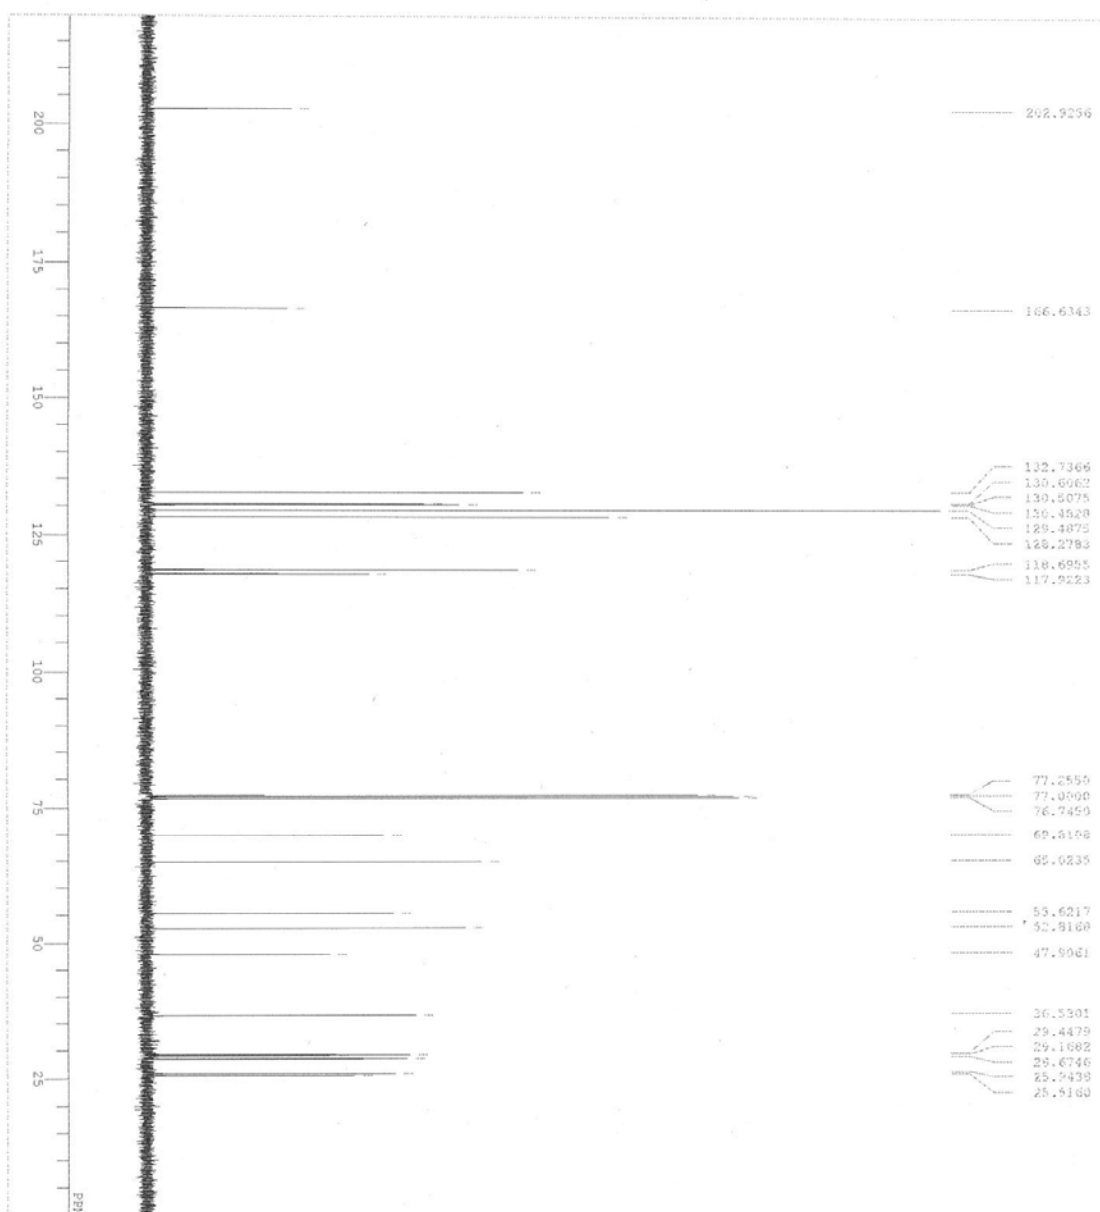

PFIIE MIB-099-C.mdata  
 CCMNT MIB-099-C  
 DATIN Fil Oct 9 00:39:17 2009  
 CCMUC 13C  
 EXMOD bcn  
 OBSFO 125.65 MHz  
 OBSRT 120.00 KHz  
 OBSIN 7958.00 Hz  
 POINT 32768  
 FREOU 33898.30 Hz  
 SCANS 529  
 ACQTM 0.9667 sec  
 PD 2.0333 sec  
 PUL 5.50 usec  
 IRNUC 1H  
 CTEUP 30.1 C  
 SLVNT CDCl3  
 EXREF 77.00 ppm  
 BF 1.20 Hz  
 RGAIN 31

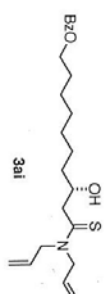

Supplement: Supplementary file 1 [file 4498351]
